# Supplementary material for: Dioxygenase-catalysed cis-dihydroxylation of meta-substituted phenols to yield cyclohexenone cis-diol and derived enantiopure cis-triol metabolites
Source: Royal Society of Chemistry journal article supplement (doi:10.1039/c0ob00894j), 2011-01-01

## Supplementary Data

### Index

Contents of Supporting Information page

1

### NMR Spectra

|                                                                                                                       |    |
|-----------------------------------------------------------------------------------------------------------------------|----|
| Proton spectrum (4 <i>R</i> ,5 <i>S</i> )-4,5-Dihydroxy-3-ethyl-cyclohex-2-enone <b>6g</b>                            | 2  |
| Carbon spectrum (4 <i>R</i> ,5 <i>S</i> )-4,5-Dihydroxy-3-ethyl-cyclohex-2-enone <b>6g</b>                            | 3  |
| Proton spectrum (4 <i>R</i> ,5 <i>S</i> )-4,5-Dihydroxy-3- <i>iso</i> -propylcyclohex-2-enone <b>6h</b>               | 4  |
| Carbon spectrum (4 <i>R</i> ,5 <i>S</i> )-4,5-Dihydroxy-3- <i>iso</i> -propylcyclohex-2-enone <b>6h</b>               | 5  |
| Proton spectrum (4 <i>R</i> ,5 <i>S</i> )-4,5-Dihydroxy-3- <i>tert</i> -butylcyclohex-2-enone <b>6i</b>               | 6  |
| Carbon spectrum (4 <i>R</i> ,5 <i>S</i> )-4,5-Dihydroxy-3- <i>tert</i> -butylcyclohex-2-enone <b>6i</b>               | 7  |
| Proton spectrum (4 <i>R</i> ,5 <i>S</i> )-4,5-Dihydroxy-3-trifluoromethylcyclohex-2-enone <b>6j</b>                   | 8  |
| Carbon spectrum (4 <i>R</i> ,5 <i>S</i> )-4,5-Dihydroxy-3-trifluoromethylcyclohex-2-enone <b>6j</b>                   | 9  |
| Proton spectrum (4 <i>R</i> ,5 <i>S</i> )-4,5-Dihydroxy-3-phenylcyclohex-2-enone <b>6k</b>                            | 10 |
| Carbon spectrum (4 <i>R</i> ,5 <i>S</i> )-4,5-Dihydroxy-3-phenylcyclohex-2-enone <b>6k</b>                            | 11 |
| Proton spectrum (1 <i>S</i> ,2 <i>S</i> ,4 <i>R</i> )-6-Iodo-cyclohex-5-ene-1,2,3-triol <b>12f</b>                    | 12 |
| Carbon spectrum (1 <i>S</i> ,2 <i>S</i> ,4 <i>R</i> )-6-Iodo-cyclohex-5-ene-1,2,3-triol <b>12f</b>                    | 13 |
| Proton spectrum (1 <i>R</i> ,2 <i>S</i> ,4 <i>R</i> )-6-Trifluoromethylcyclohex-5-ene-1,2,3-triol <b>12j</b>          | 14 |
| Carbon spectrum (1 <i>R</i> ,2 <i>S</i> ,4 <i>R</i> )-6-Trifluoromethylcyclohex-5-ene-1,2,3-triol <b>12j</b>          | 15 |
| Proton spectrum 2-Hydroxyl-7,7-Dimethyl-6-oxooctanoic acid <b>15i</b>                                                 | 16 |
| Carbon spectrum 2-Hydroxyl-7,7-Dimethyl-6-oxooctanoic acid <b>15i</b>                                                 | 17 |
| Proton spectrum (1 <i>S</i> ,2 <i>R</i> )-1,2-Dihydroxy-3-(3'-hydroxyphenyl)cyclohexa-3,5-diene <b>17</b>             | 18 |
| Carbon spectrum (1 <i>S</i> ,2 <i>R</i> )-1,2-Dihydroxy-3-(3'-hydroxyphenyl)cyclohexa-3,5-diene <b>17</b>             | 19 |
| Proton spectrum (1 <i>R</i> ,2 <i>S</i> ,4 <i>S</i> ,6 <i>R</i> )-6-Trifluoromethylcyclohexane-1,2,4-triol <b>11j</b> | 20 |
| Carbon spectrum (1 <i>R</i> ,2 <i>S</i> ,4 <i>S</i> ,6 <i>R</i> )-6-Trifluoromethylcyclohexane-1,2,4-triol <b>11j</b> | 21 |

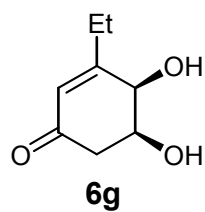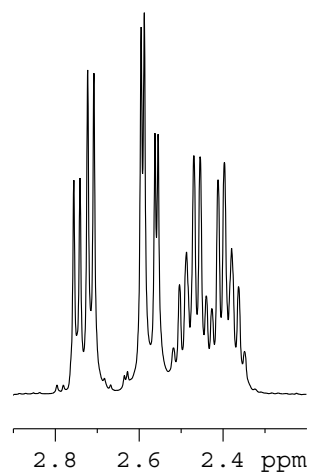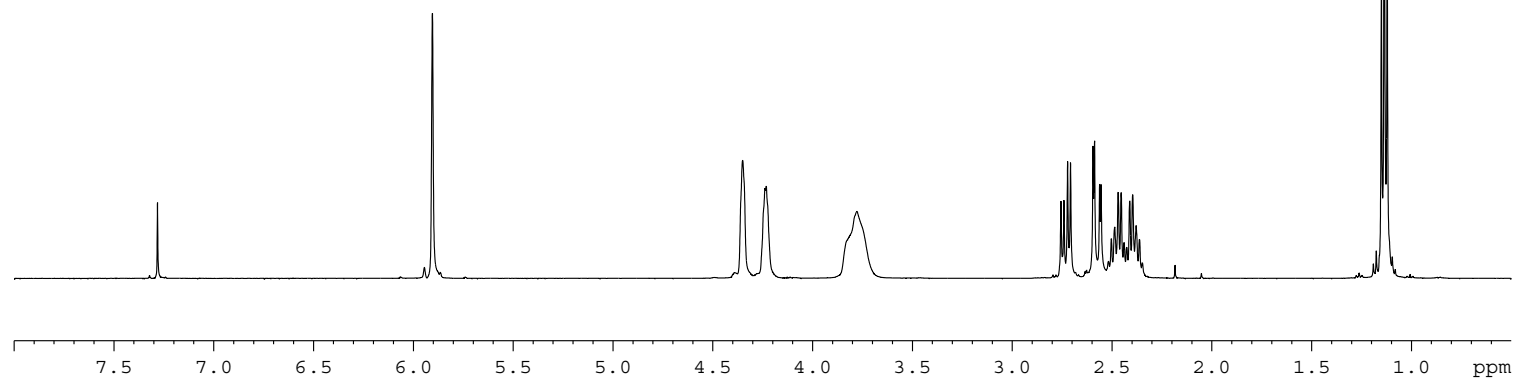

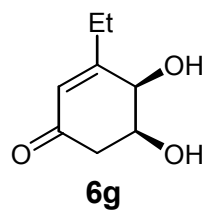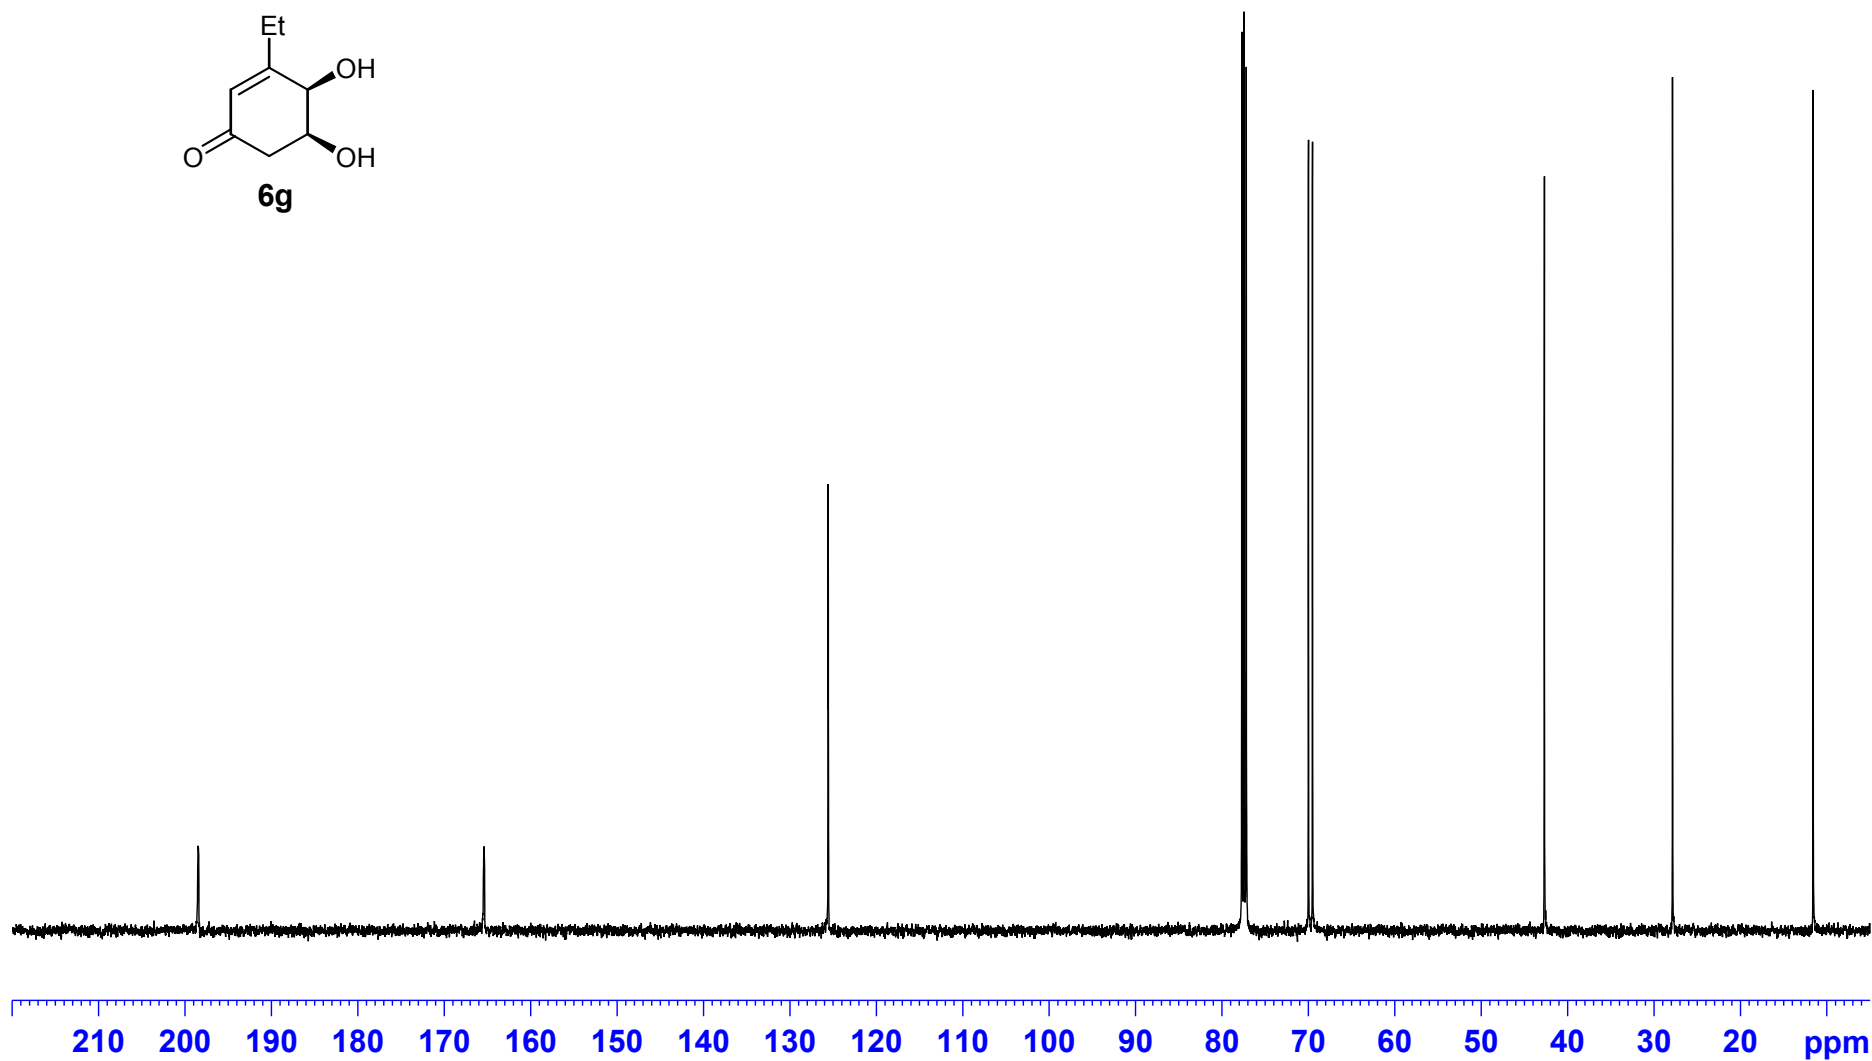

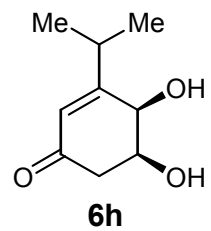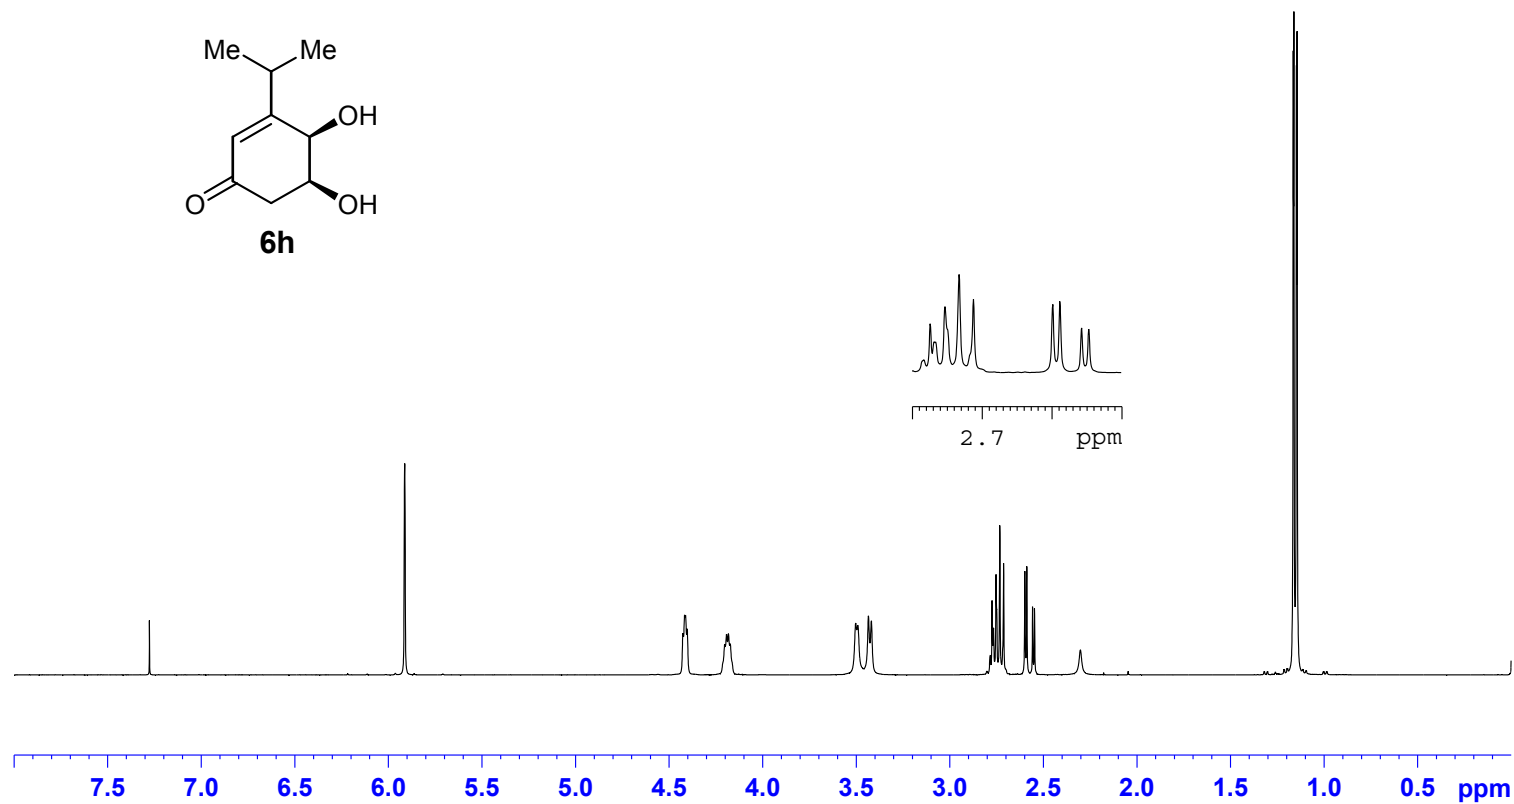

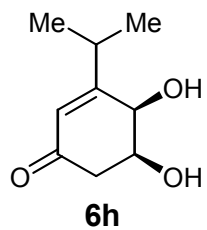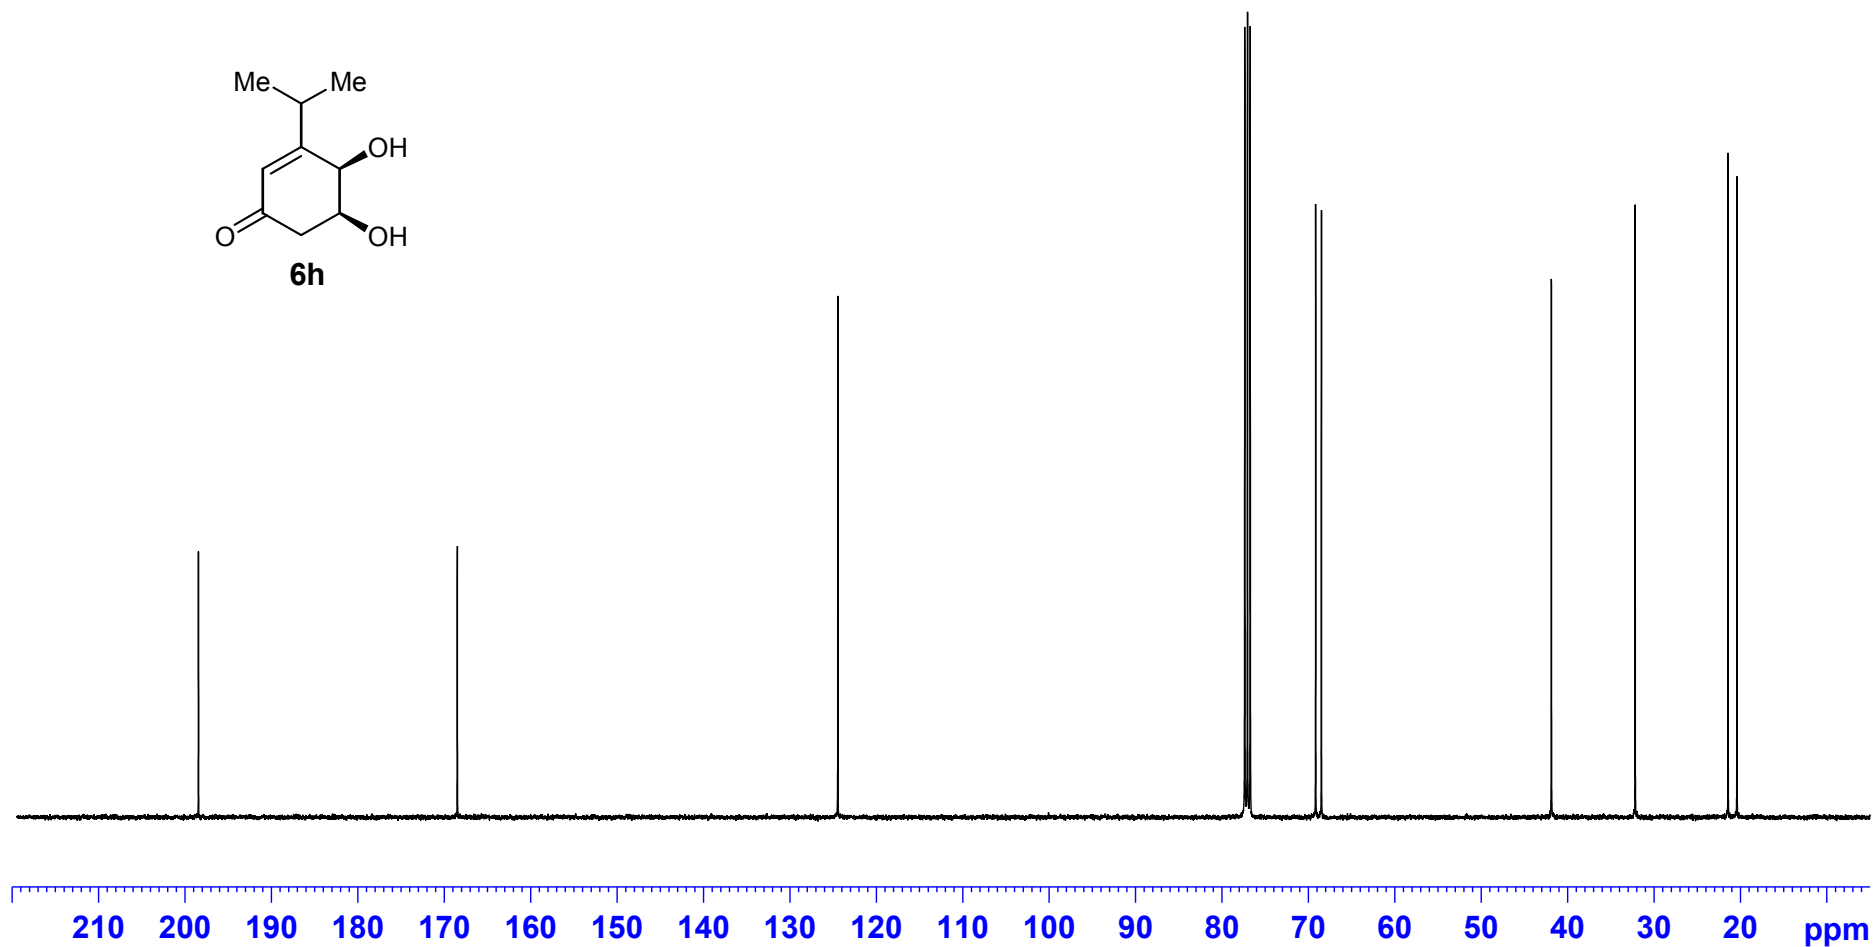

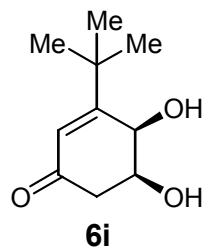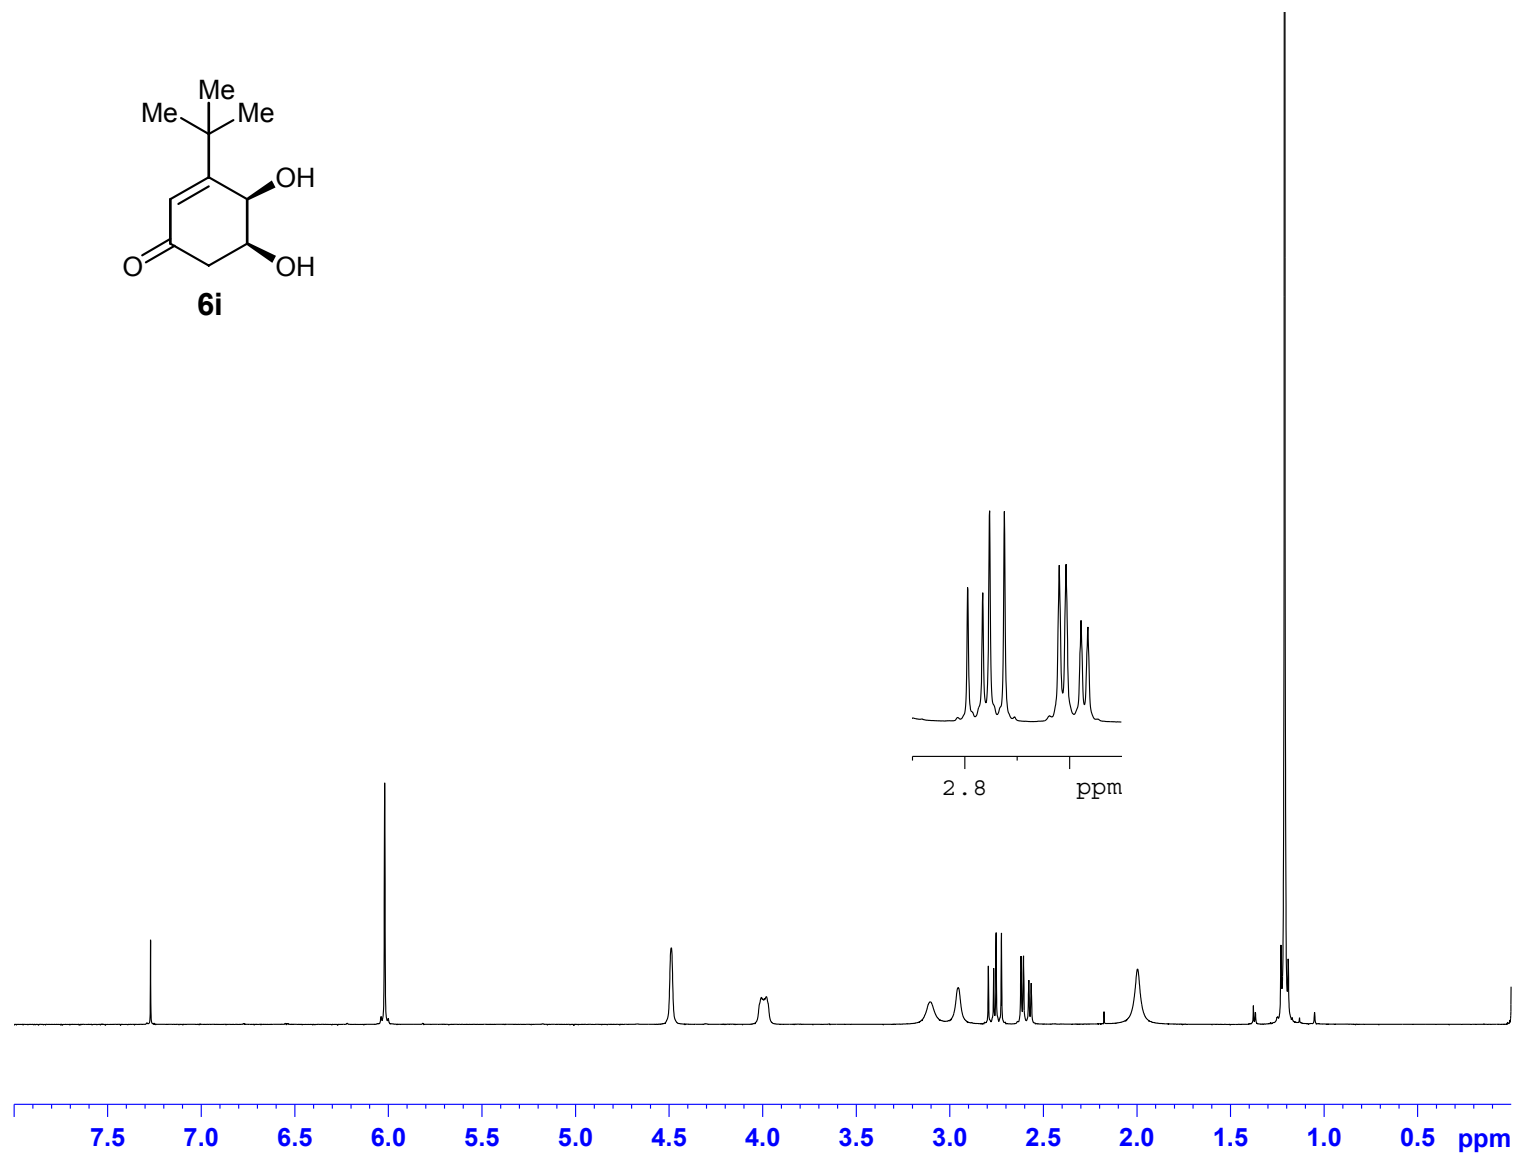

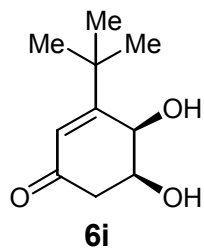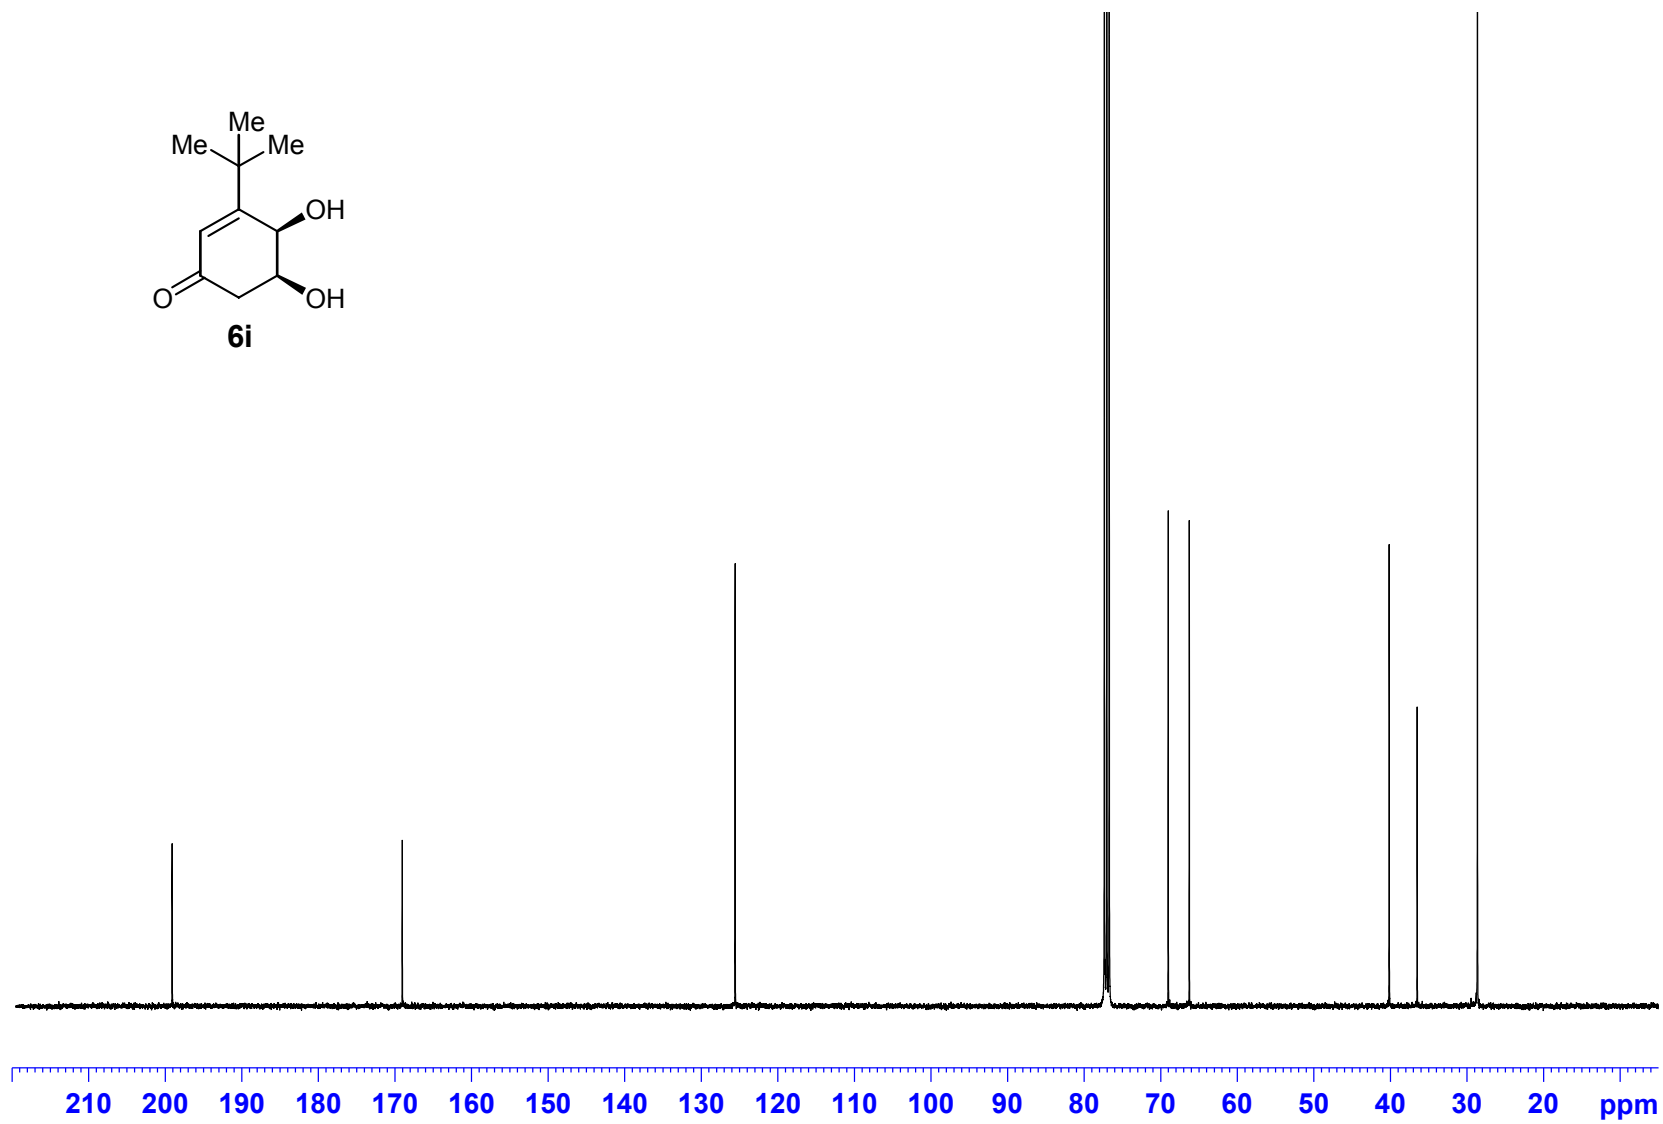

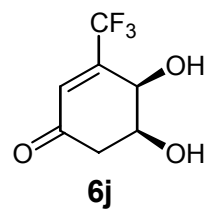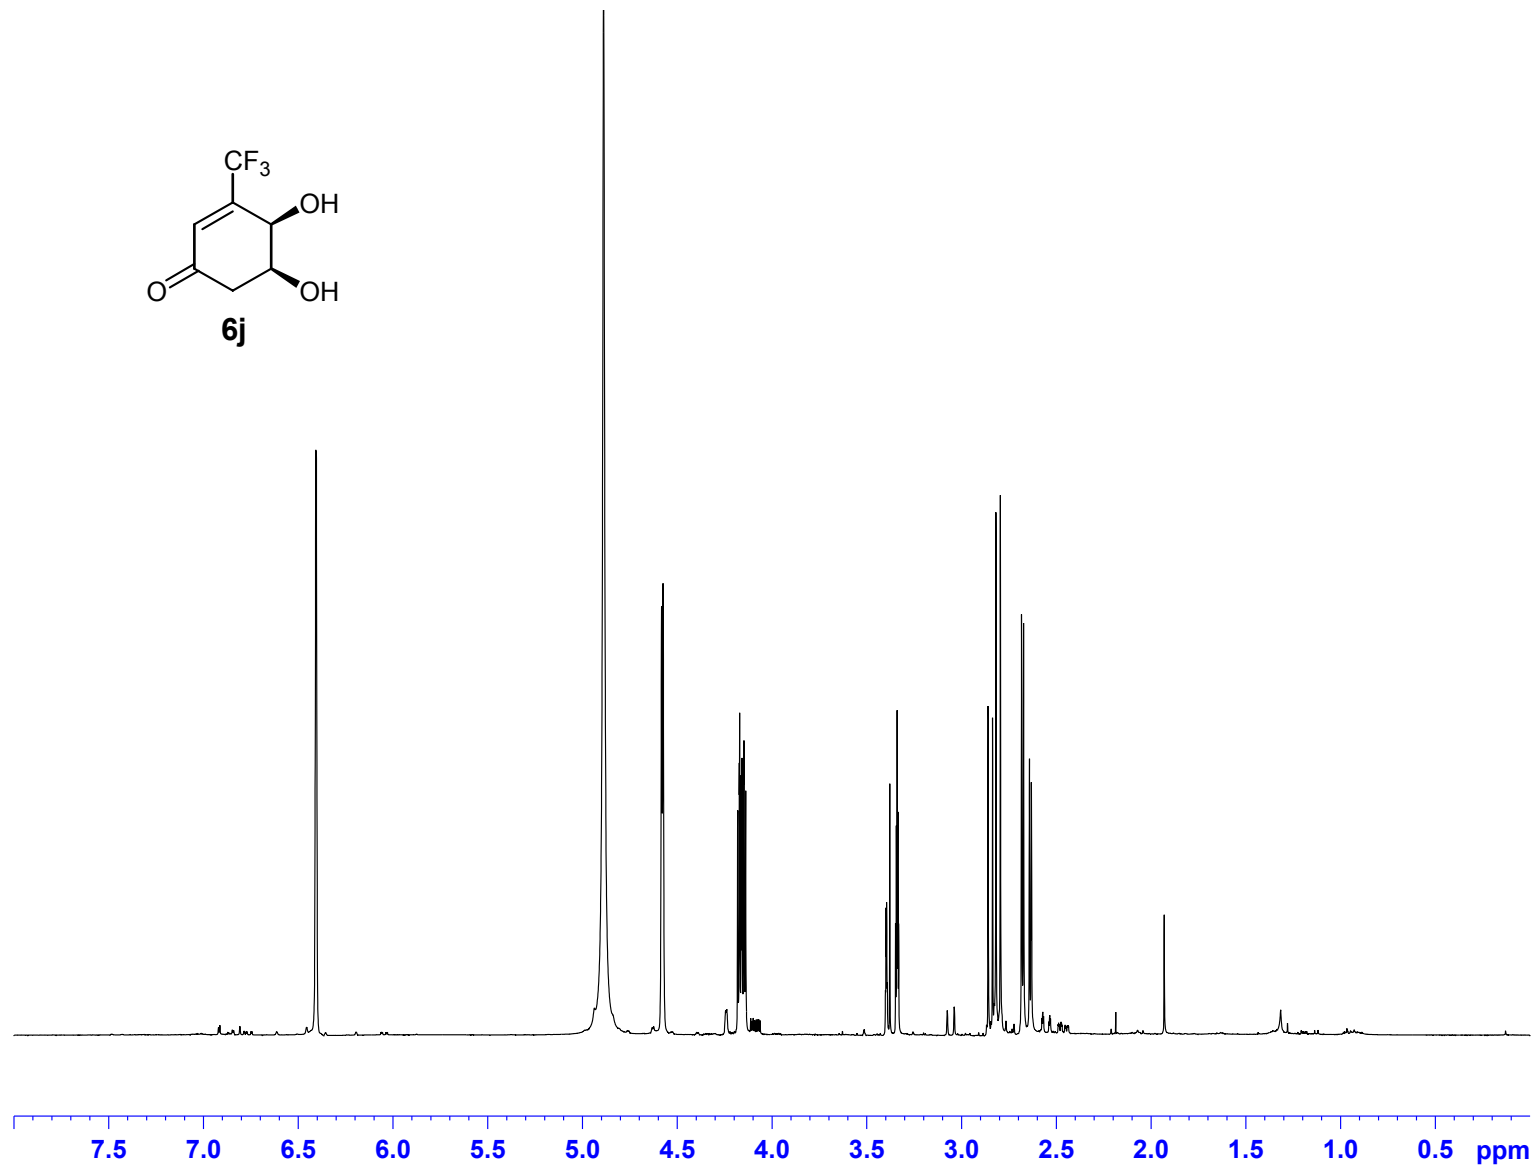



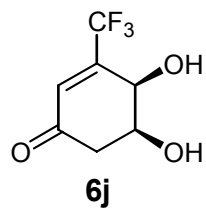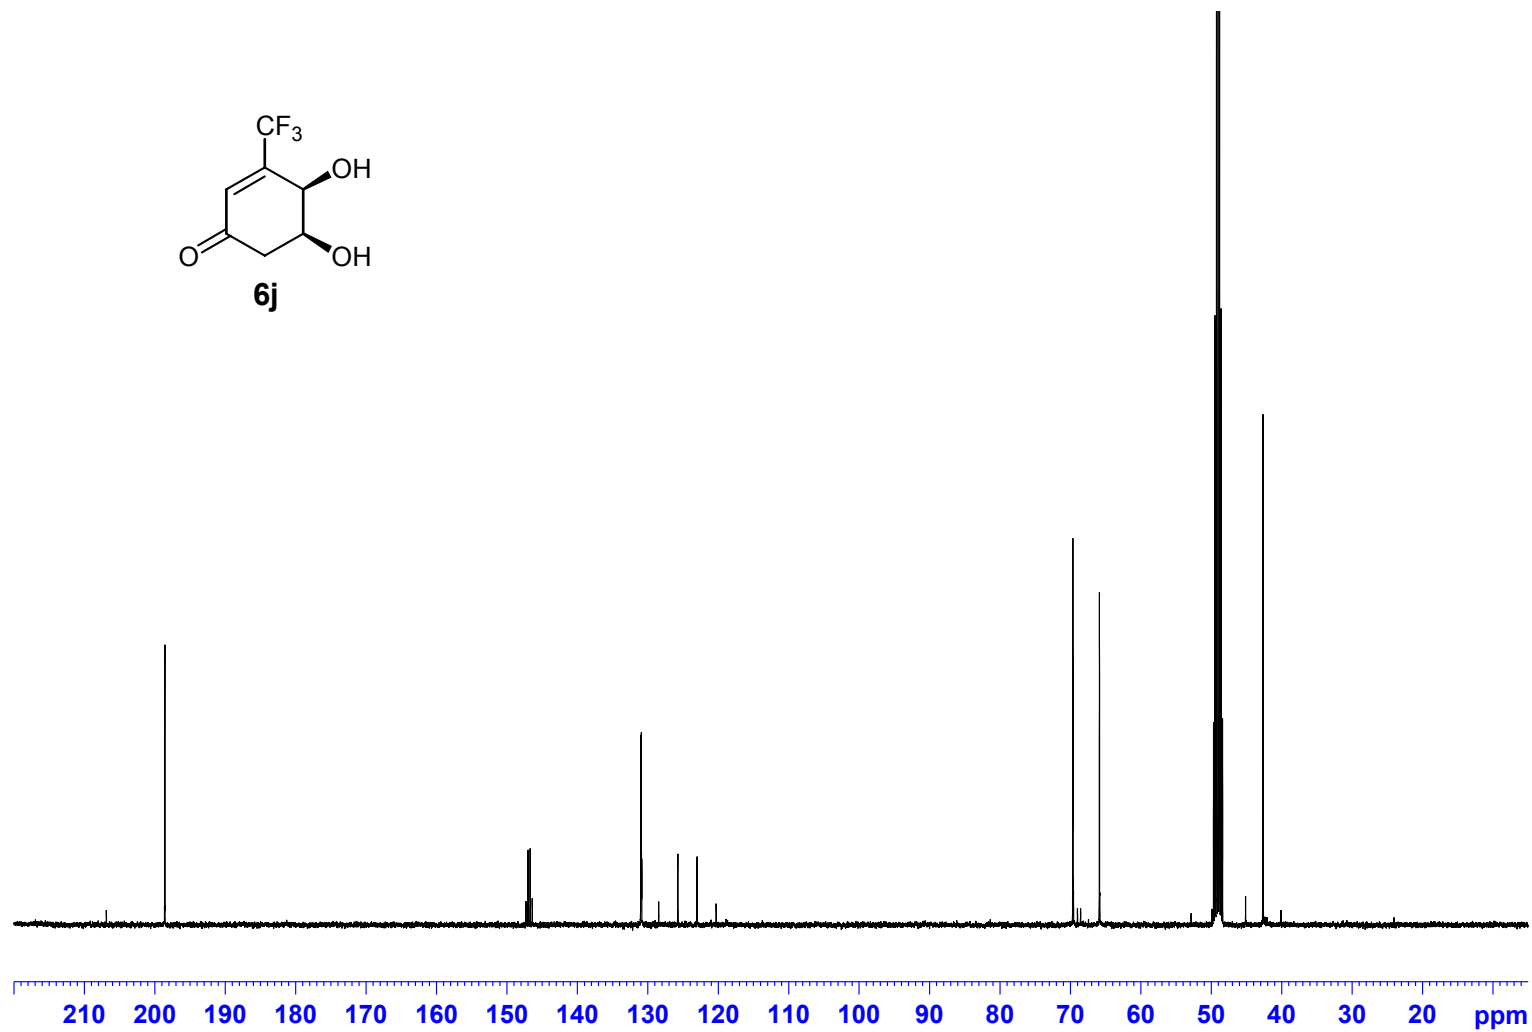

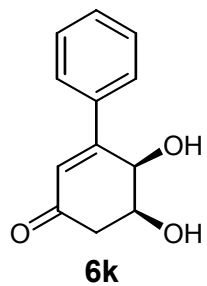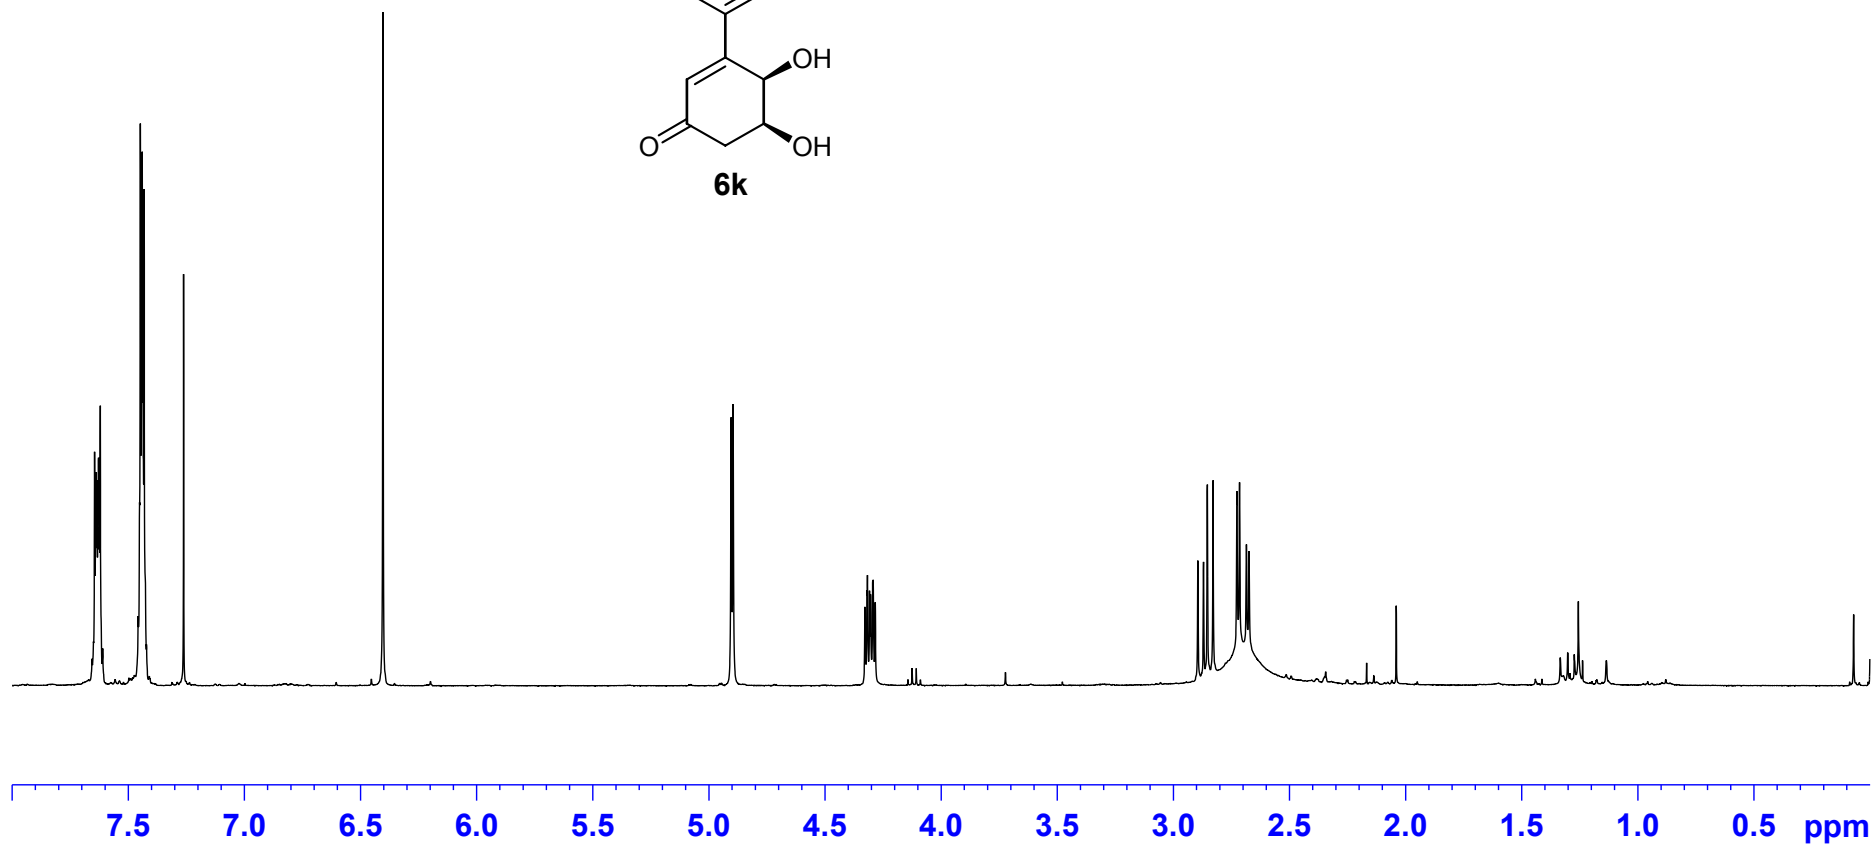

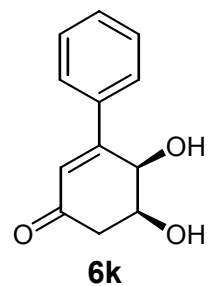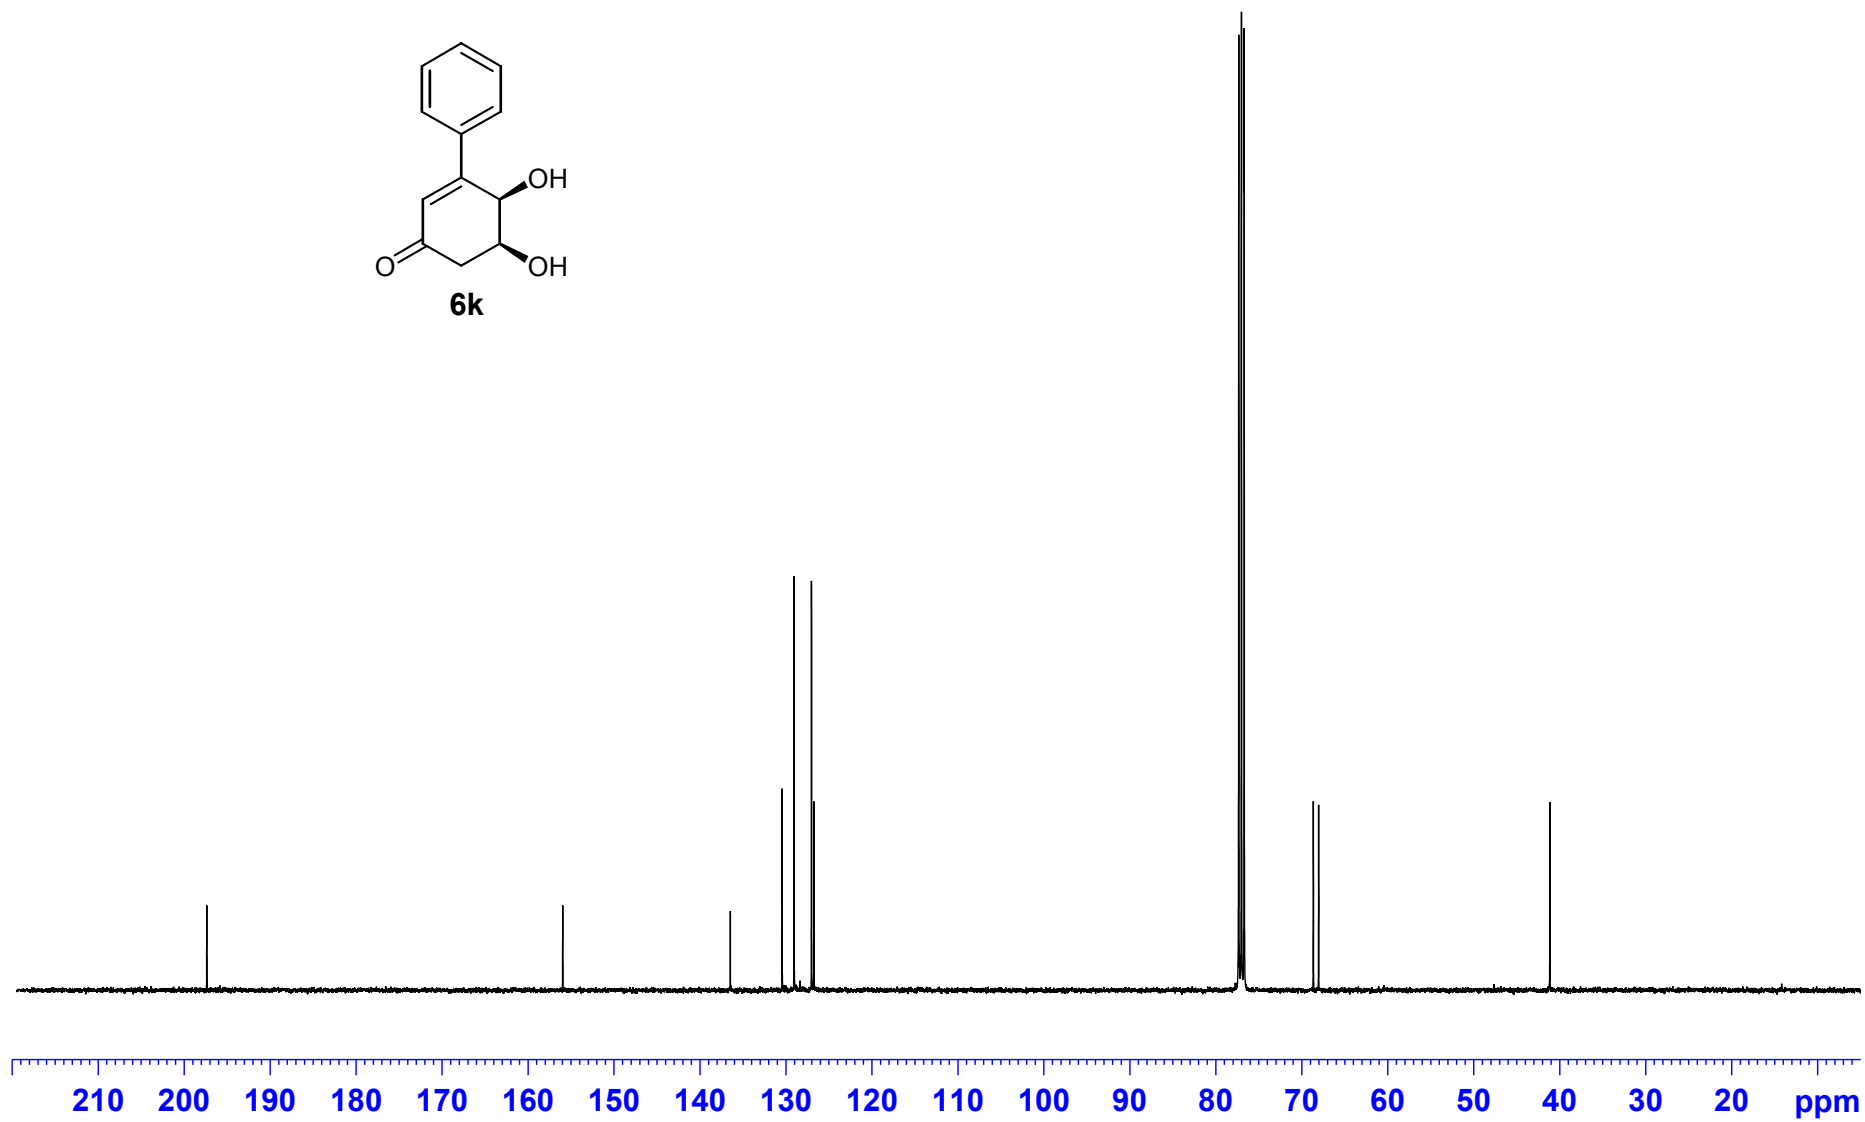

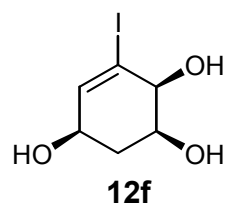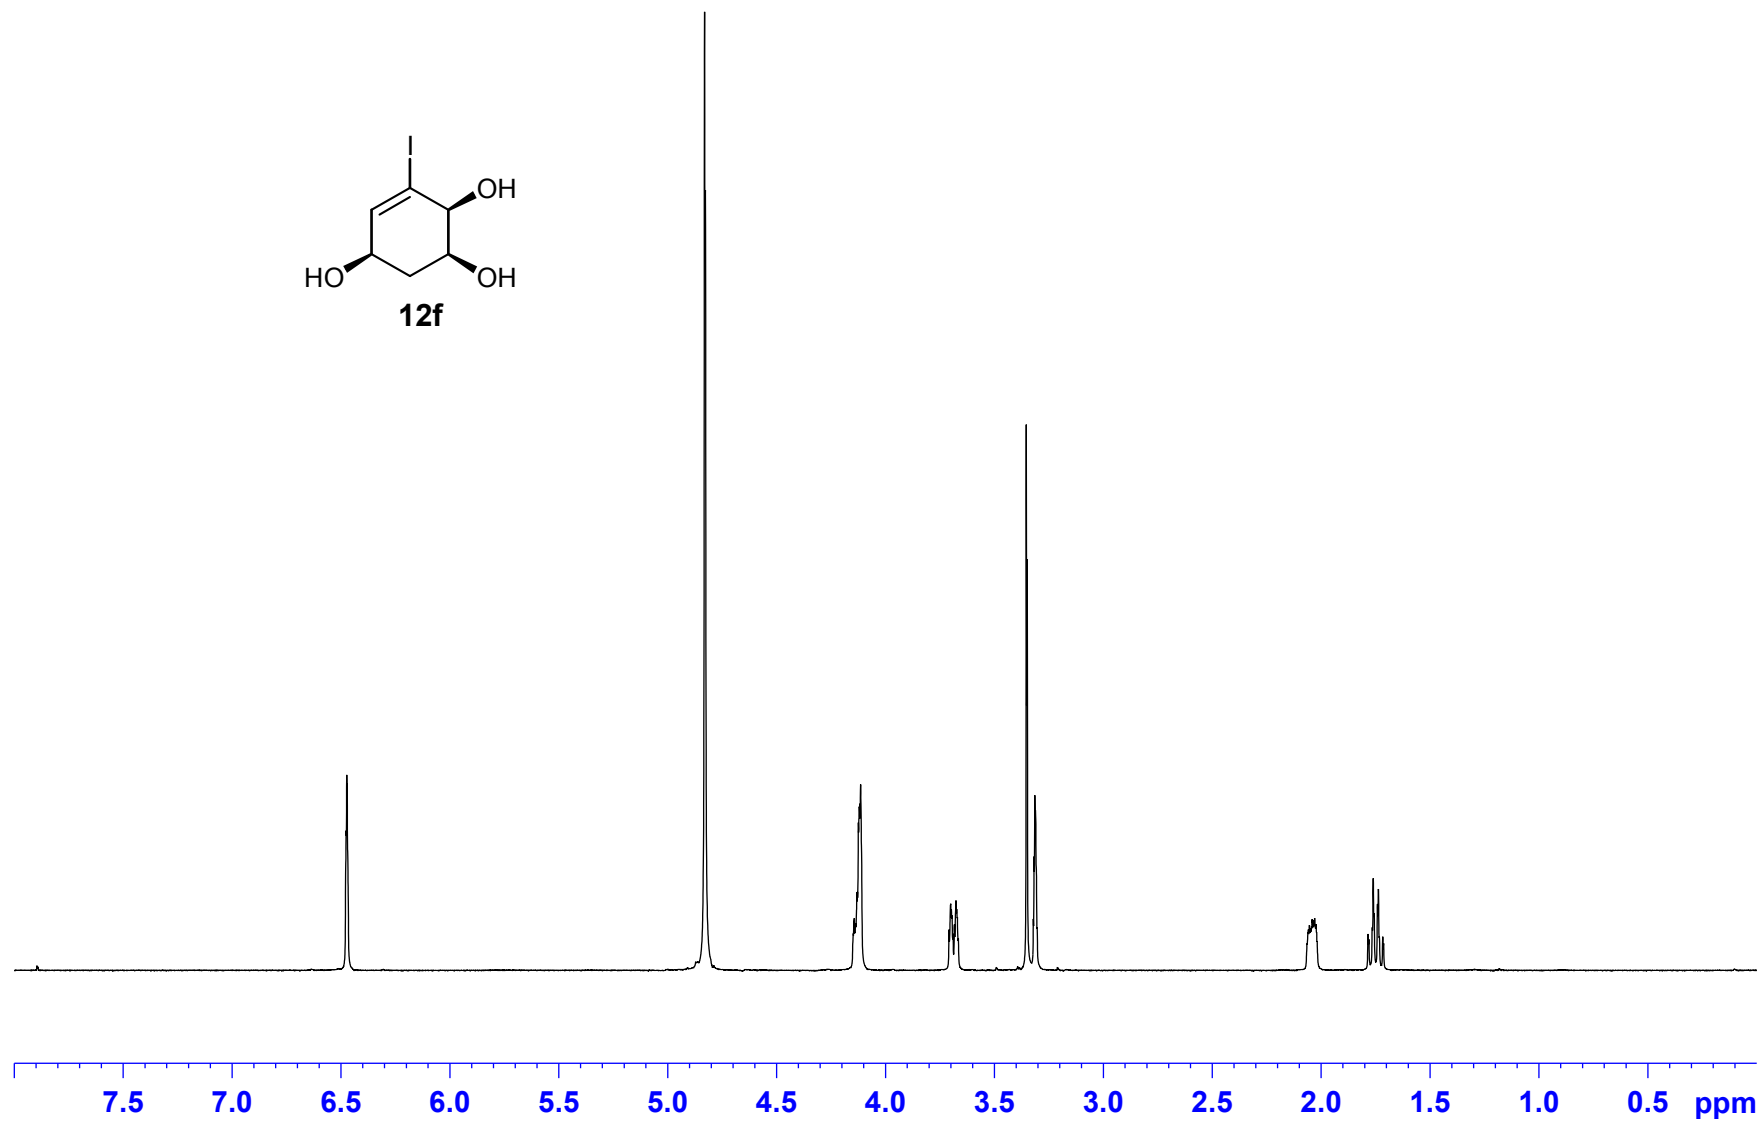

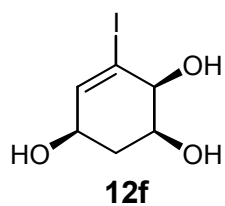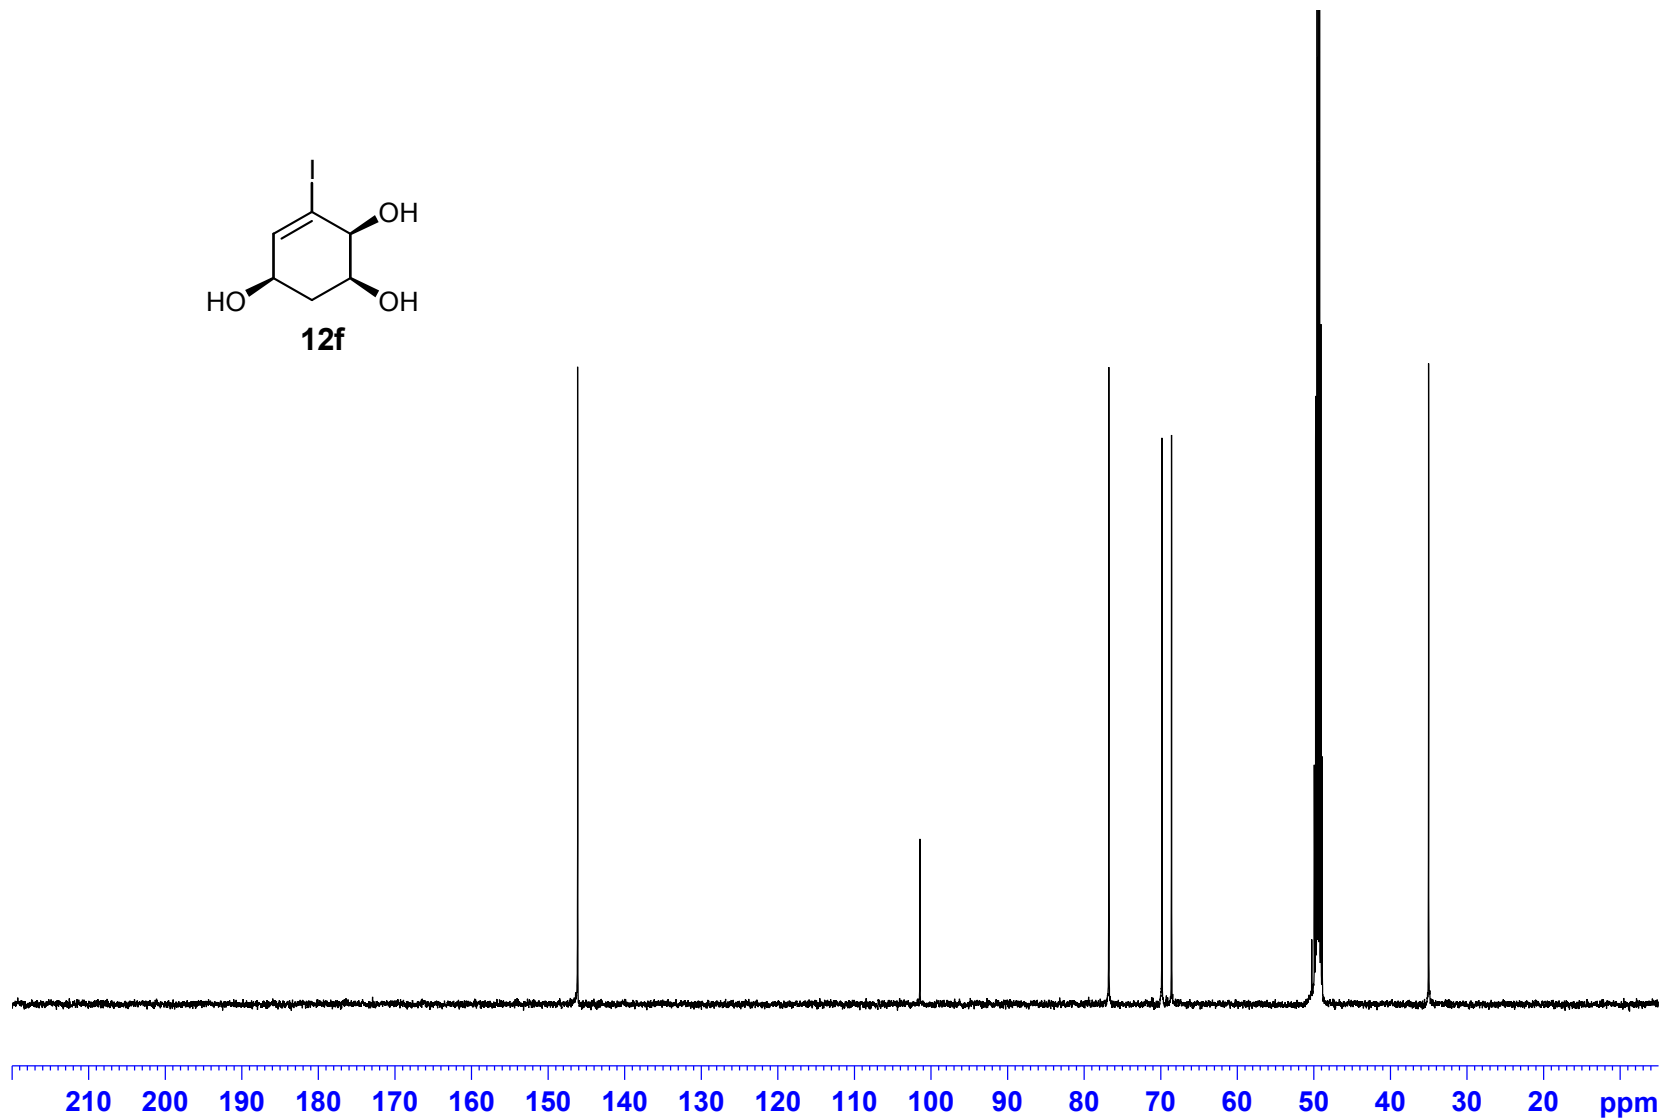

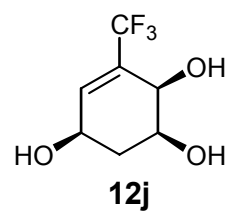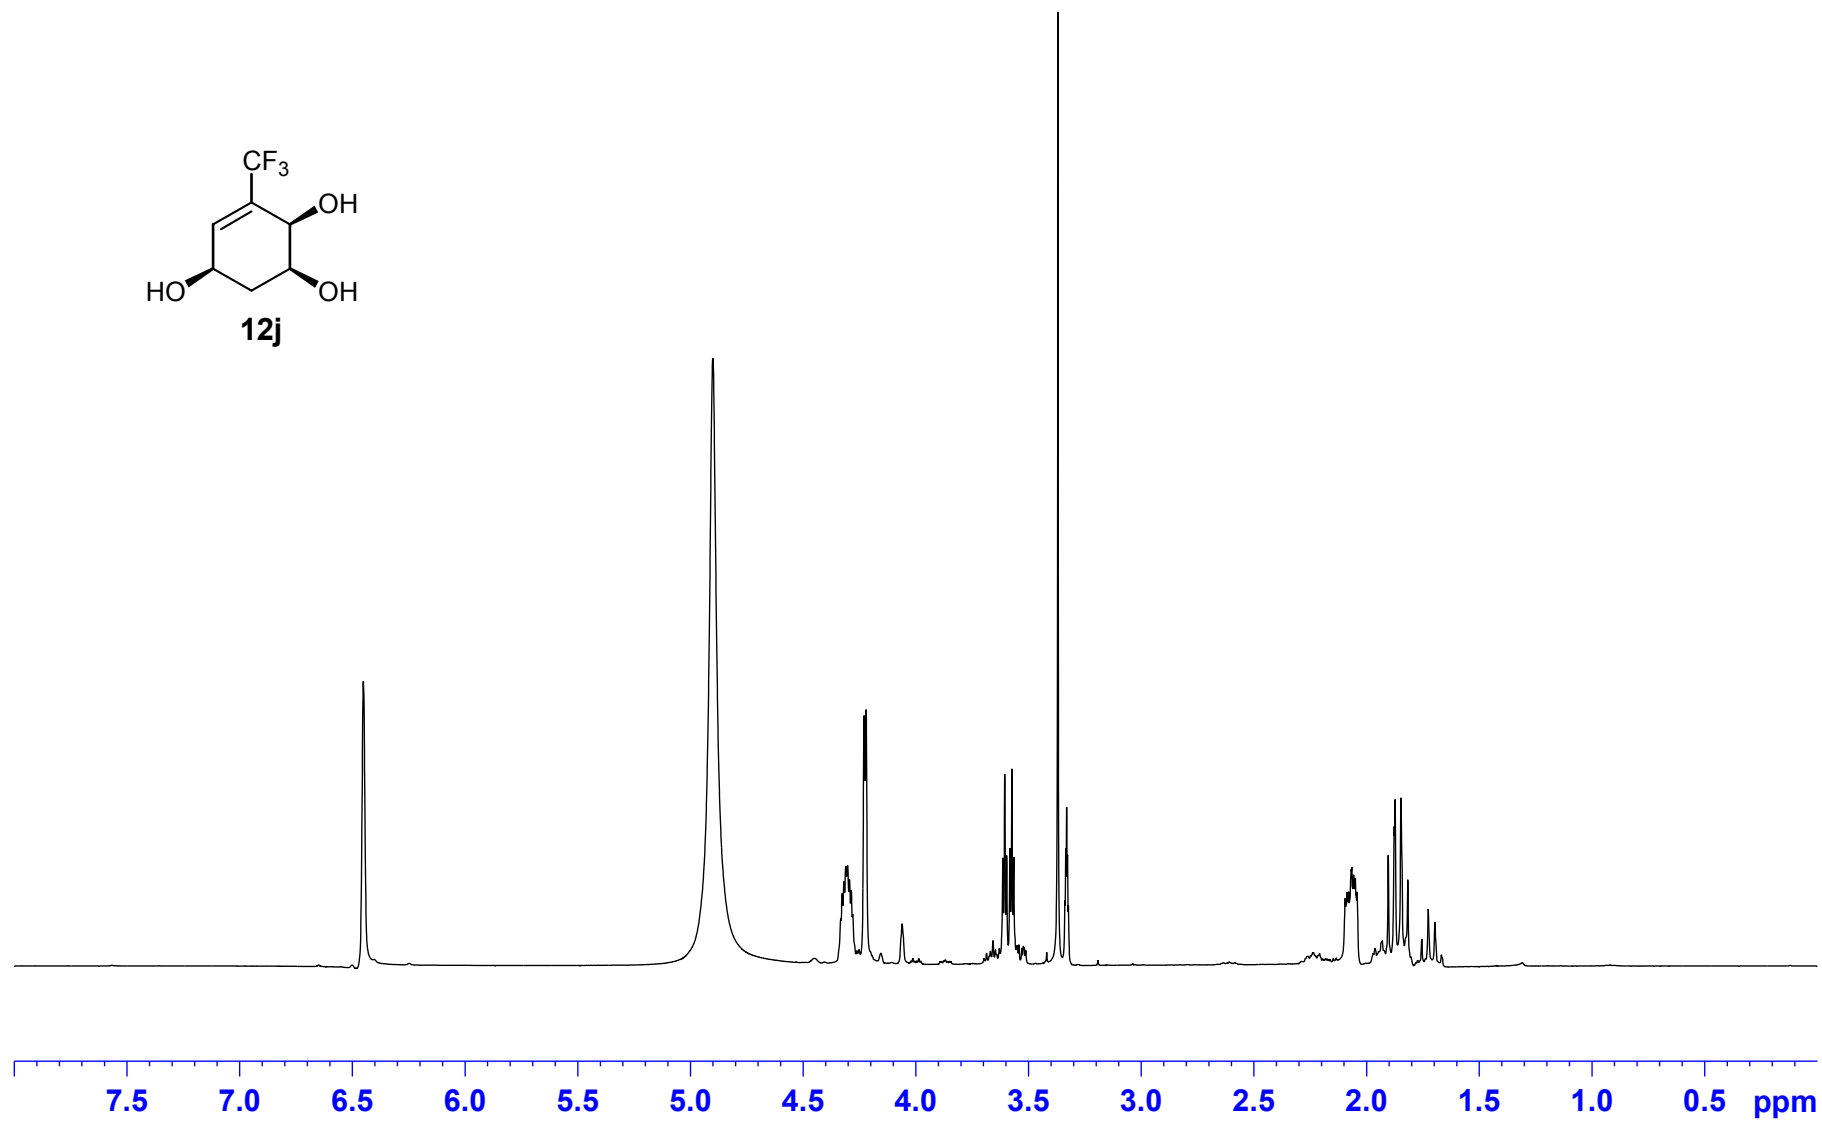

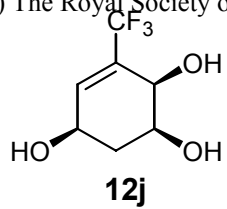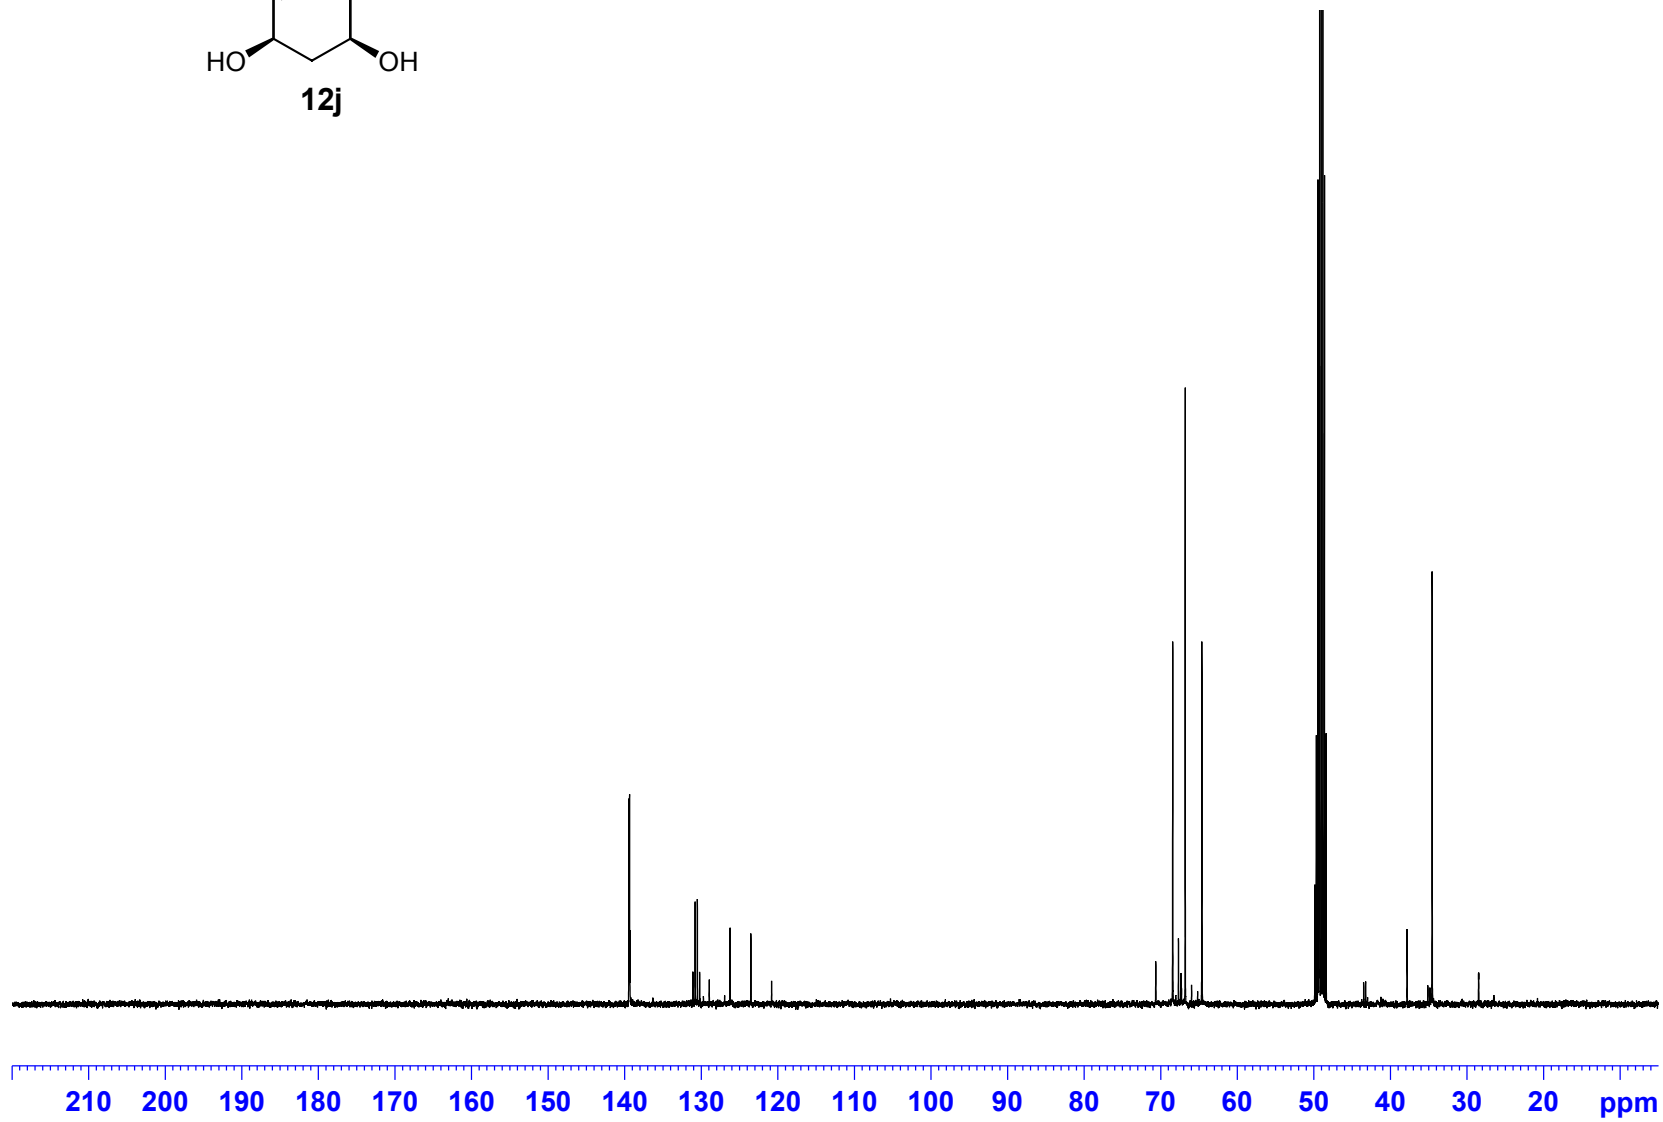

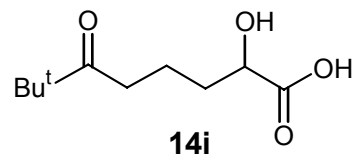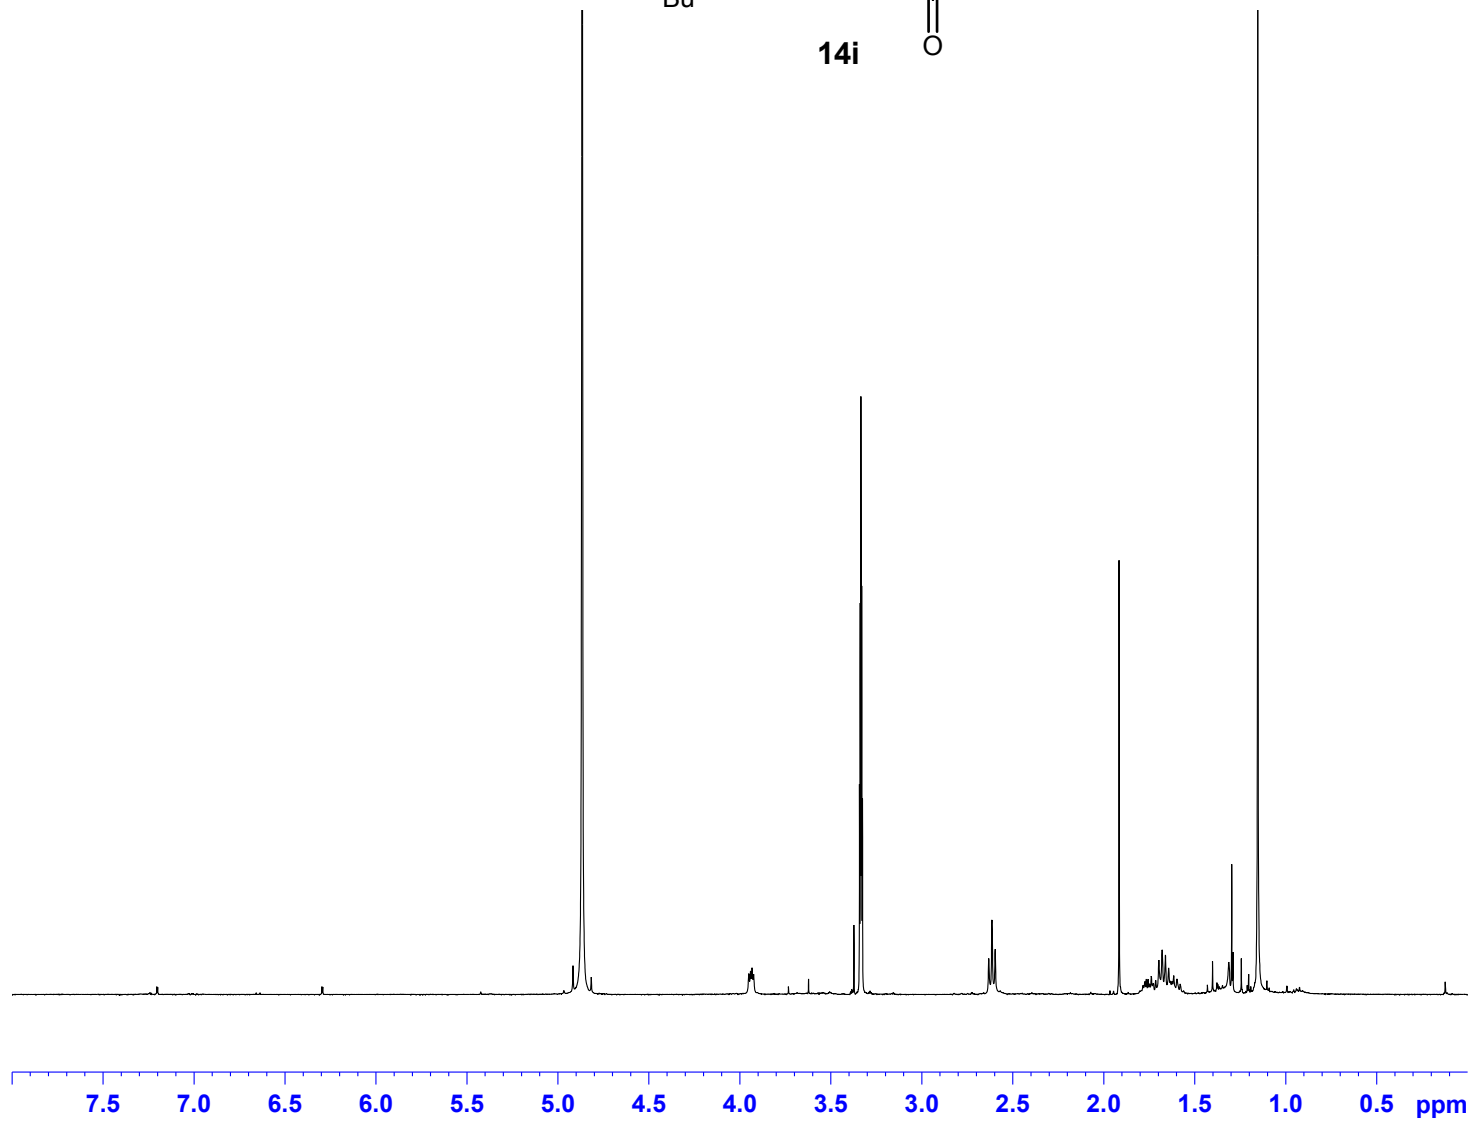



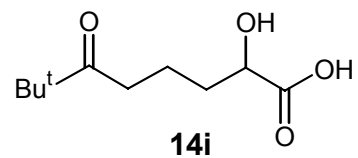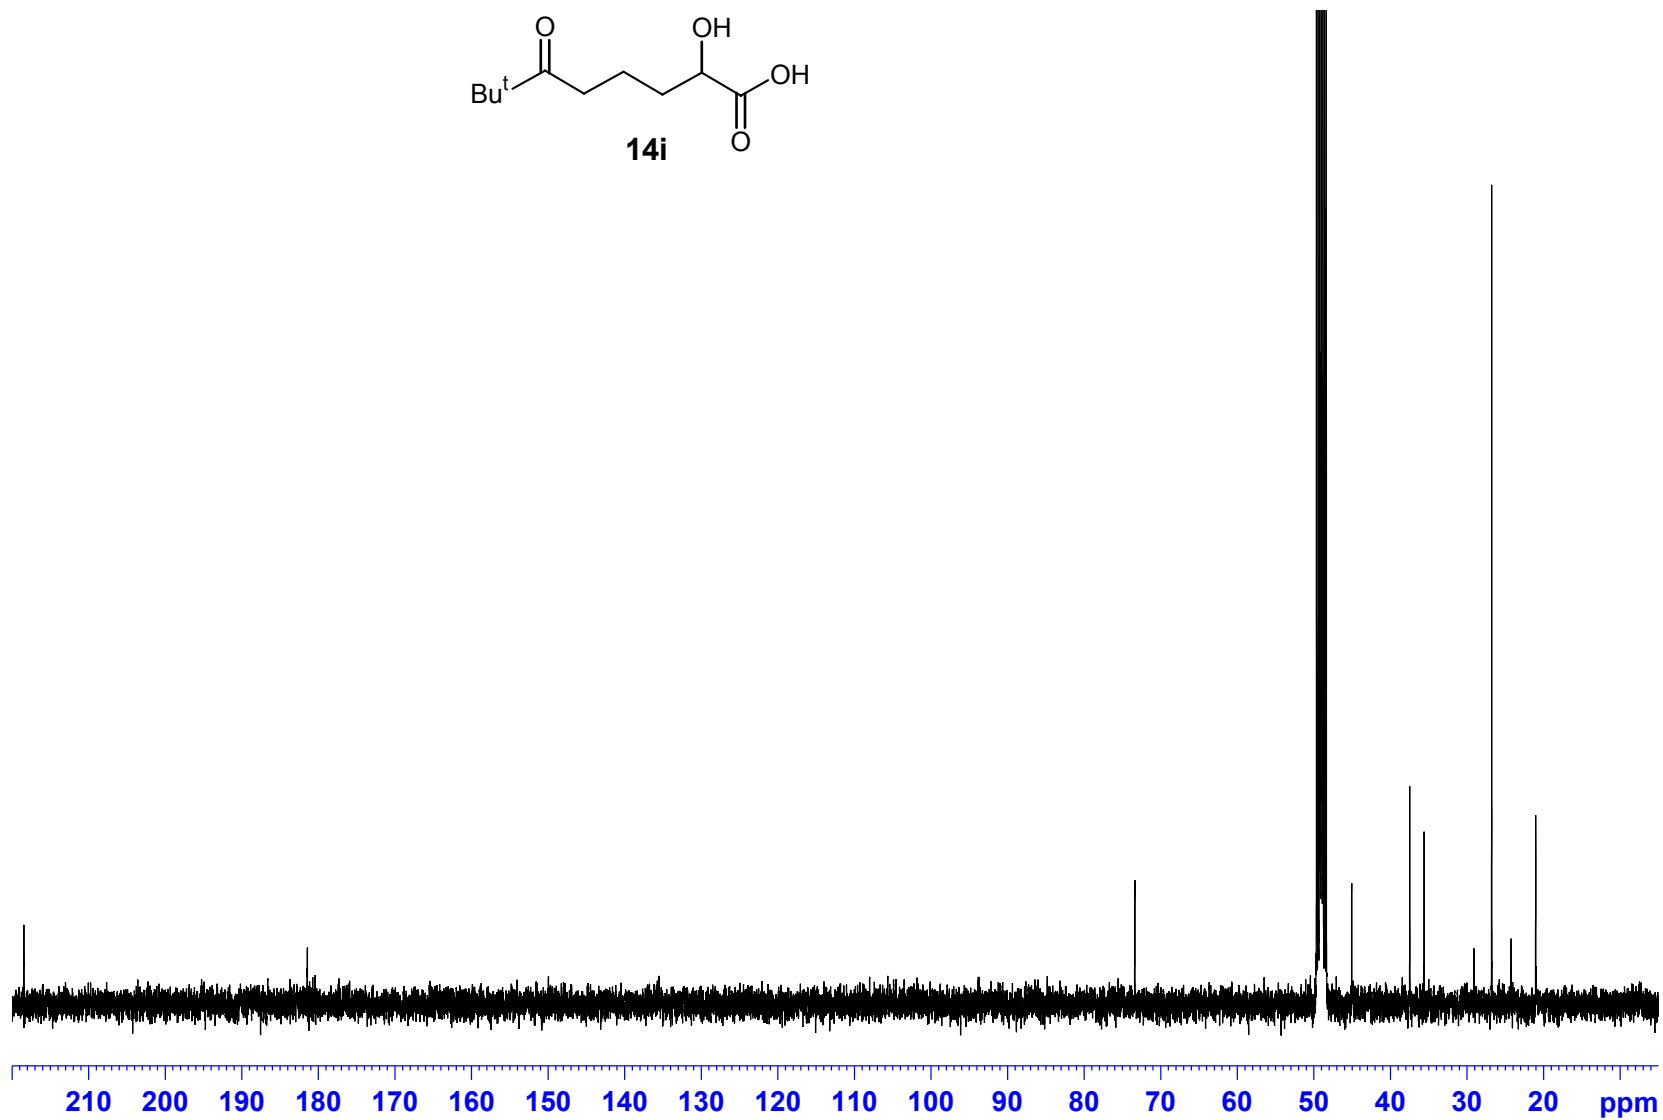

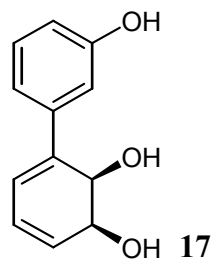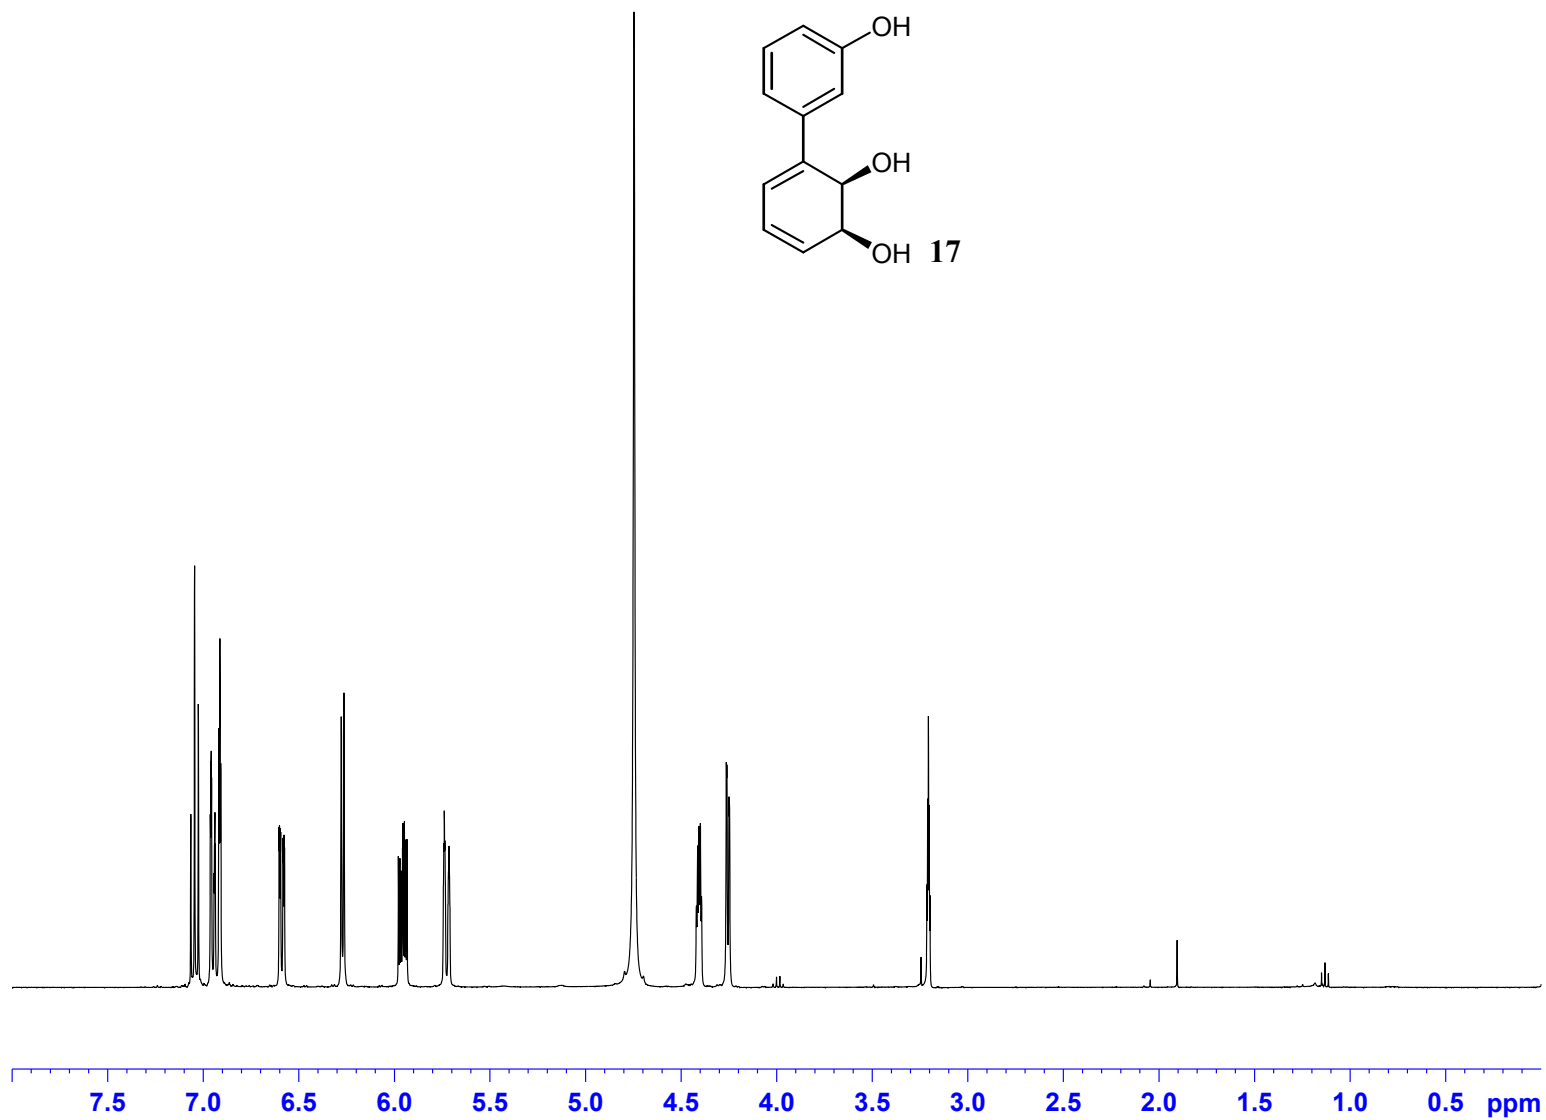

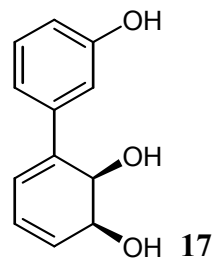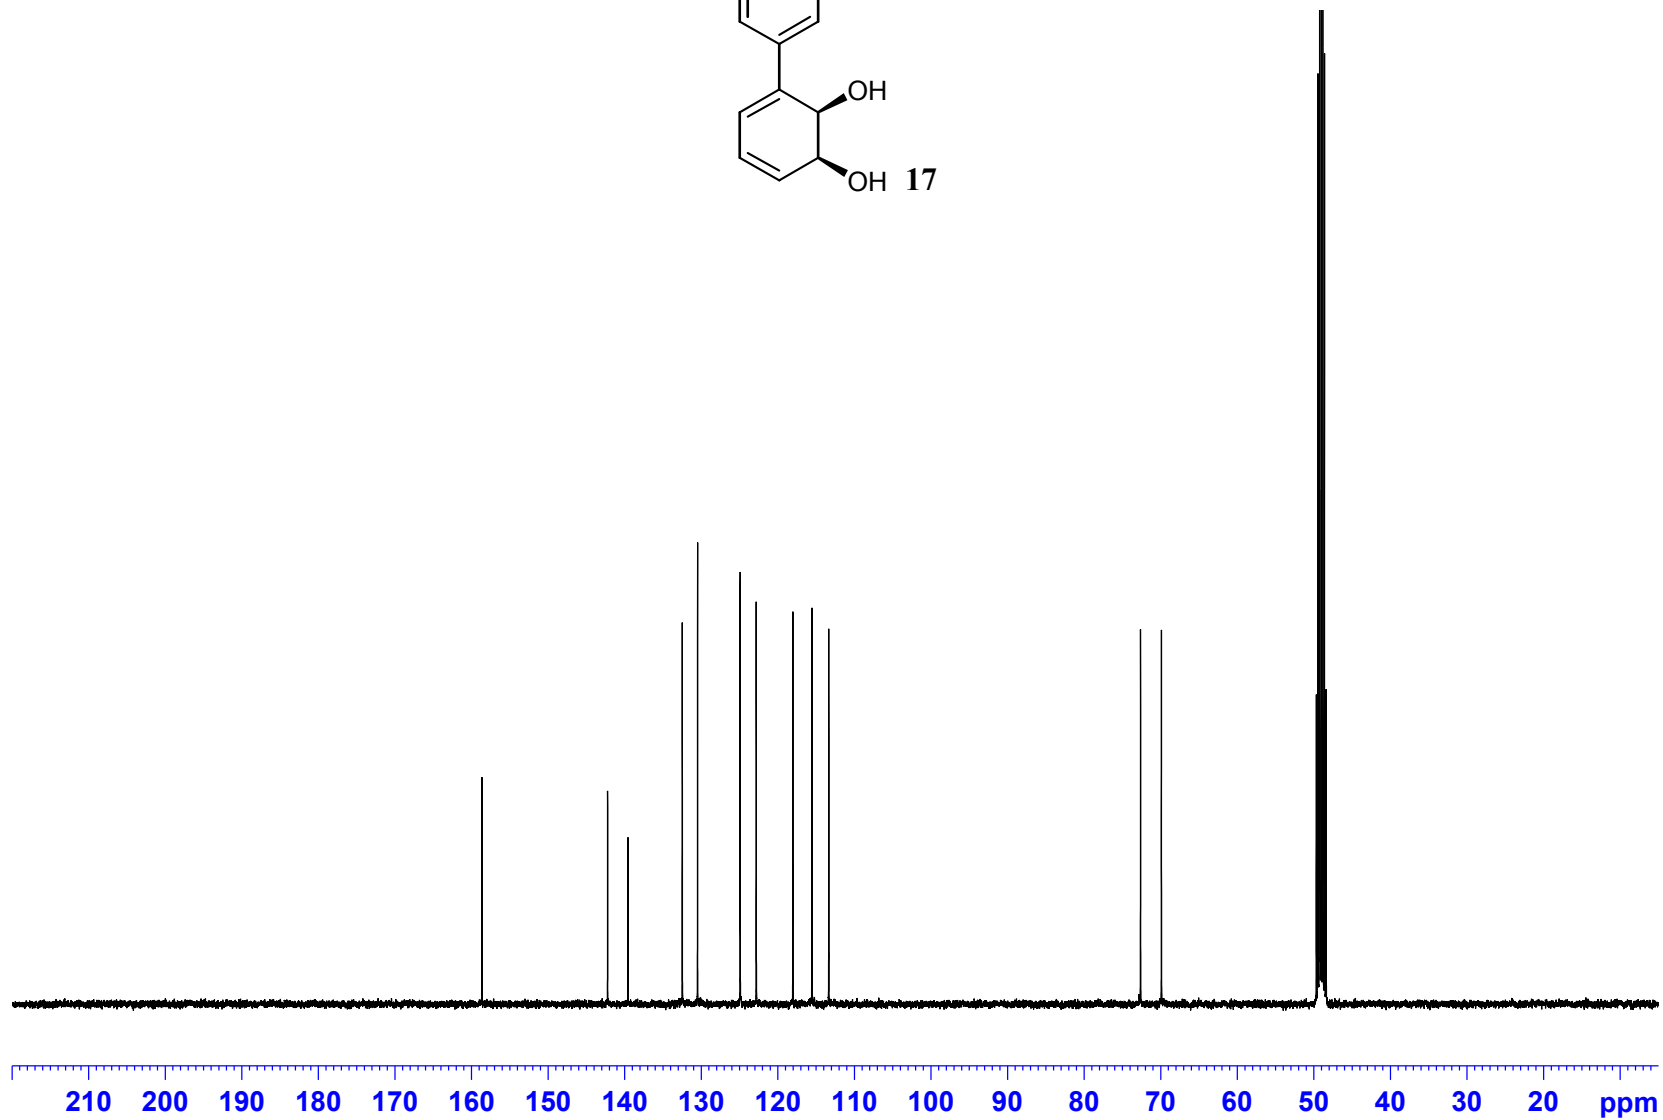

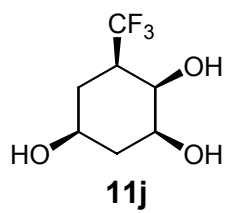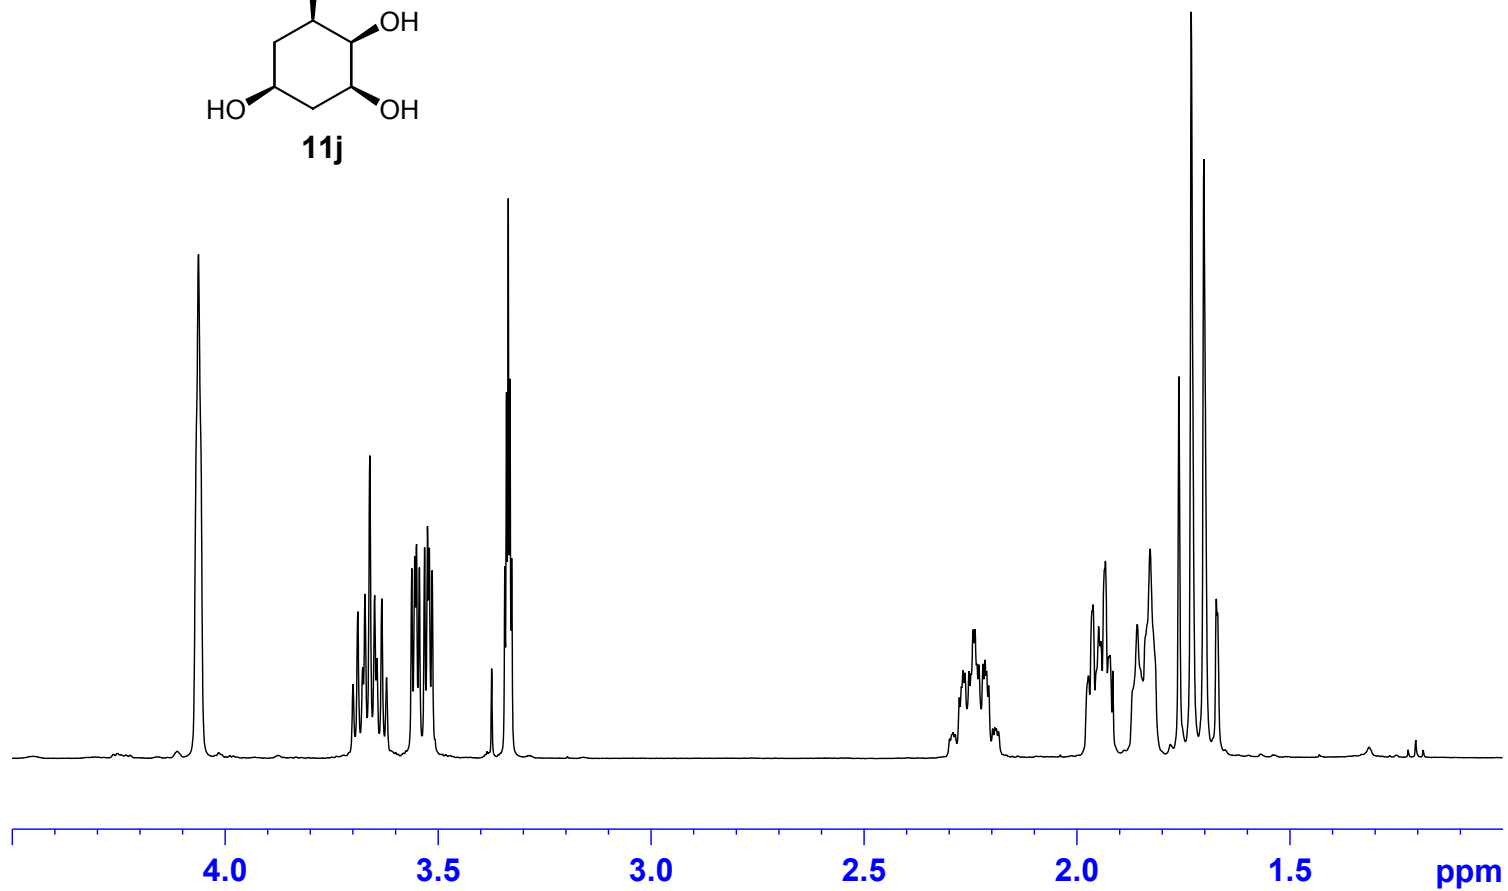

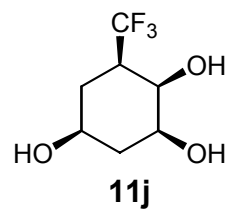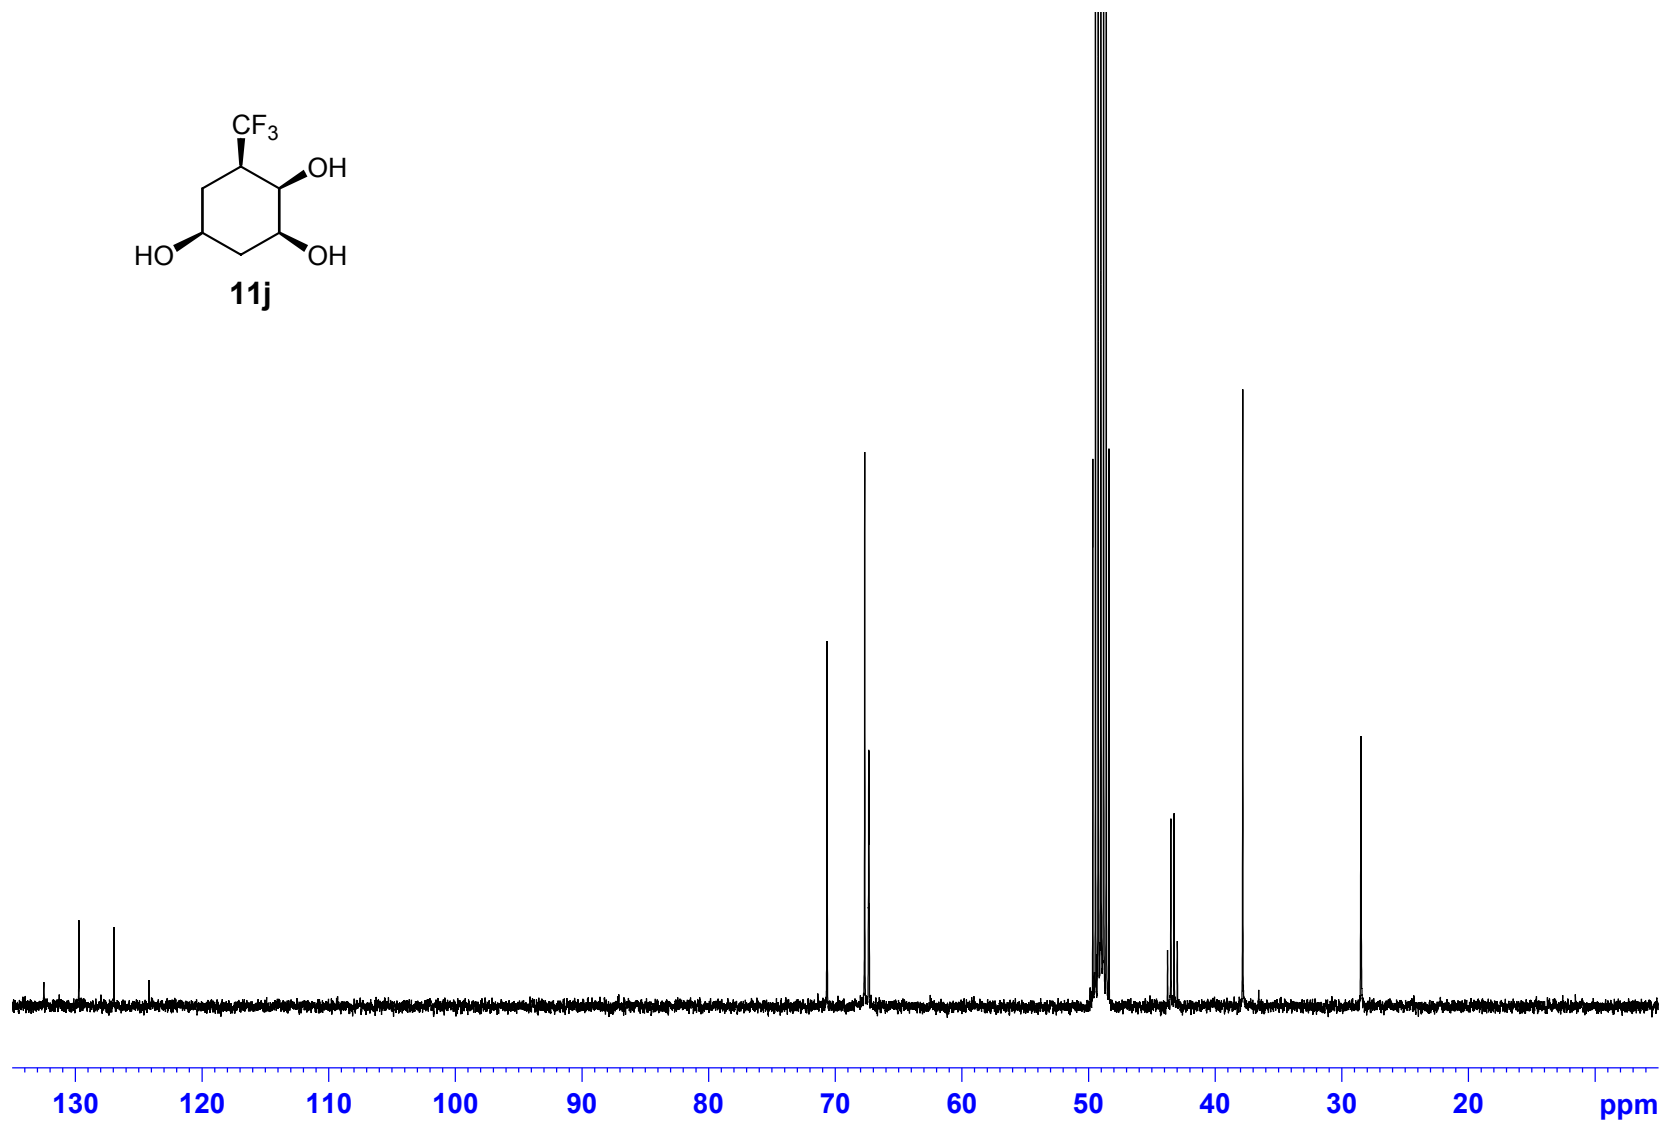

Supplement: c0ob00894j.pdf [file c0ob00894j.pdf]
